# Supplementary material for: Antileishmanial evaluation of triazole–butenolide conjugates: design, synthesis, in vitro screening, SAR and in silico ADME predictions
Source: Royal Society of Chemistry journal article supplement (doi:10.1039/d2md00464j), 2023-01-01
Supplement: d2md00464j1.pdf [file d2md00464j1.pdf]

# Antileishmanial evaluation of triazole-butenolide conjugates: Design, synthesis, *in vitro* screening, SAR and *in silico* ADME predictions

Alka Raj Pandey,<sup>a,e</sup> Suriya Pratap Singh,<sup>a</sup> Karthik Ramalingam,<sup>b</sup> Kanchan Yadav,<sup>c</sup> Amol Chhatrapati Bisen,<sup>d,f</sup> Rabi Sankar Bhatta,<sup>d,f</sup> Mrigank Srivastava,<sup>c</sup> Renu Tripathi,<sup>c</sup> Neena Goyal,<sup>b</sup> Koneni V. Sashidhara<sup>a,e,f,\*</sup>

<sup>a</sup>Medicinal and Process Chemistry Division, CSIR-Central Drug Research Institute, BS-10/1, Sector 10, Jankipuram Extension, Sitapur Road, Lucknow 226031, U.P., India.

<sup>b</sup>Division of Biochemistry, CSIR-Central Drug Research Institute, BS-10/1, Sector 10, Jankipuram Extension, Sitapur Road, Lucknow 226031, U.P., India.

<sup>c</sup>Division of Molecular Microbiology and Immunology, CSIR-Central Drug Research Institute, Lucknow 226031, U.P., India

<sup>d</sup>Pharmaceutics and Pharmacokinetics Division, CSIR-Central Drug Research Institute, Lucknow 226031, U.P., India

<sup>e</sup>Sophisticated Analytical Instrument Facility & Research, CSIR-Central Drug Research Institute, BS-10/1, Sector 10, Jankipuram Extension, Sitapur Road, Lucknow 226031, U.P., India.

<sup>f</sup>Academy of Scientific and Innovative Research (AcSIR), Ghaziabad-201002, U.P., India.

Corresponding author: Tel/ Fax: +91-522-2772450, ext. 4684 /+91-522-2771942/2771970

E-mail address: kv\_sashidhara@cdri.res.in

## Table of Contents

|                                                                |         |
|----------------------------------------------------------------|---------|
| NMR Spectra of compounds ( <b>10a-10w</b> & <b>11a</b> ).....  | S3-S29  |
| HPLC spectrum of compound ( <b>10a-10w</b> & <b>11a</b> )..... | S30-S41 |

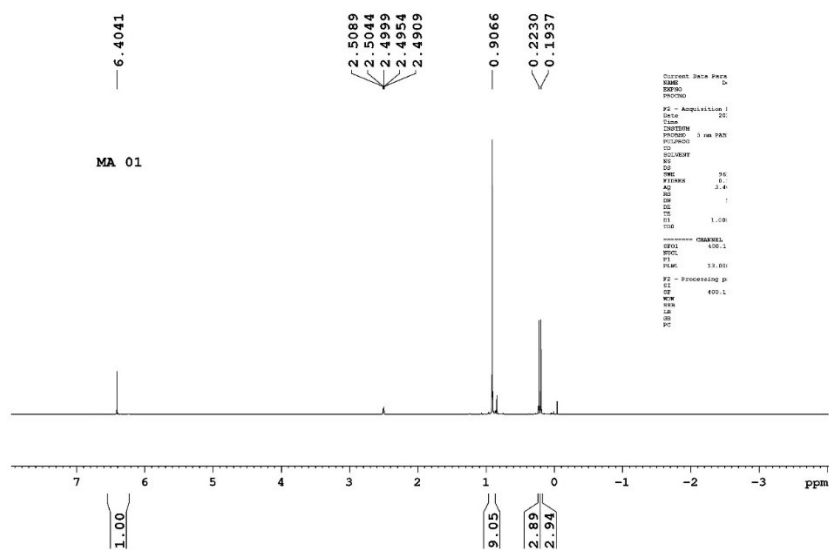

$^1\text{H}$  NMR spectrum of compound **7a**

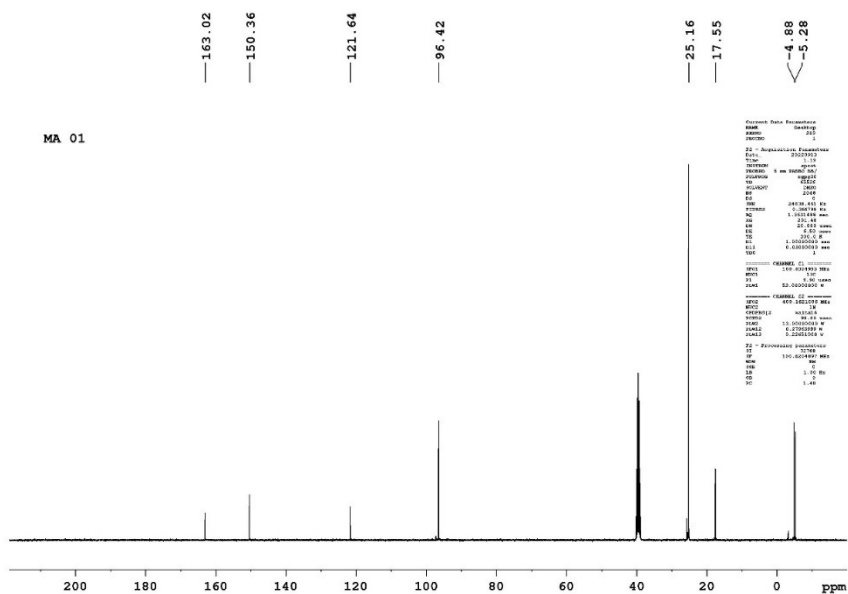

$^{13}\text{C}$  NMR spectrum of compound **7a**

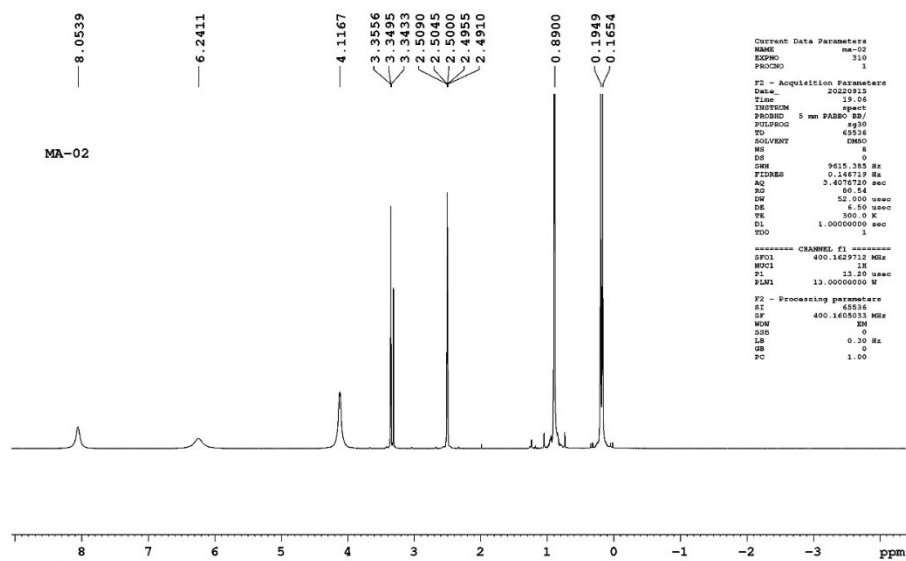

$^1\text{H}$  NMR spectrum of compound **8a**

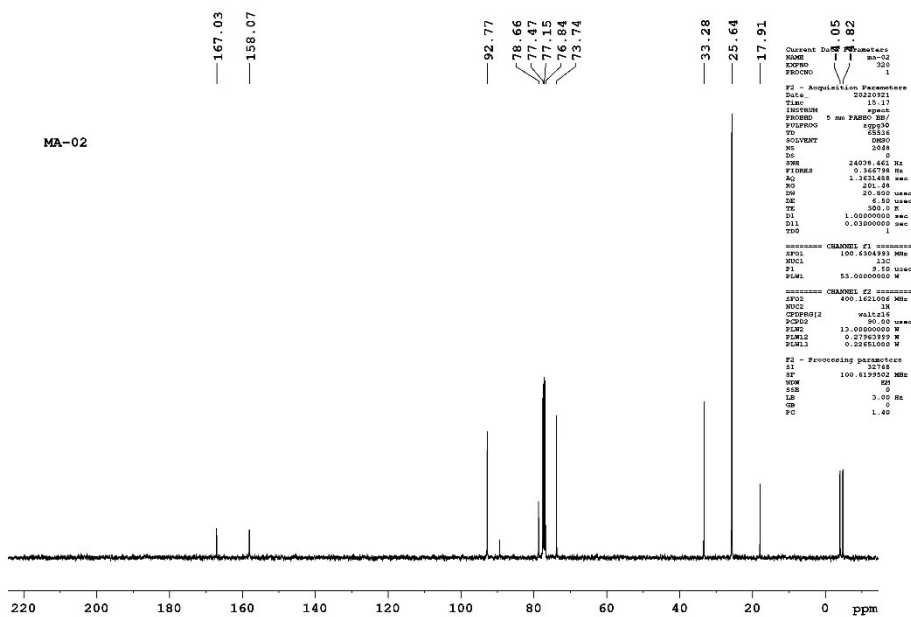

$^{13}\text{C}$  NMR spectrum of compound **8a**

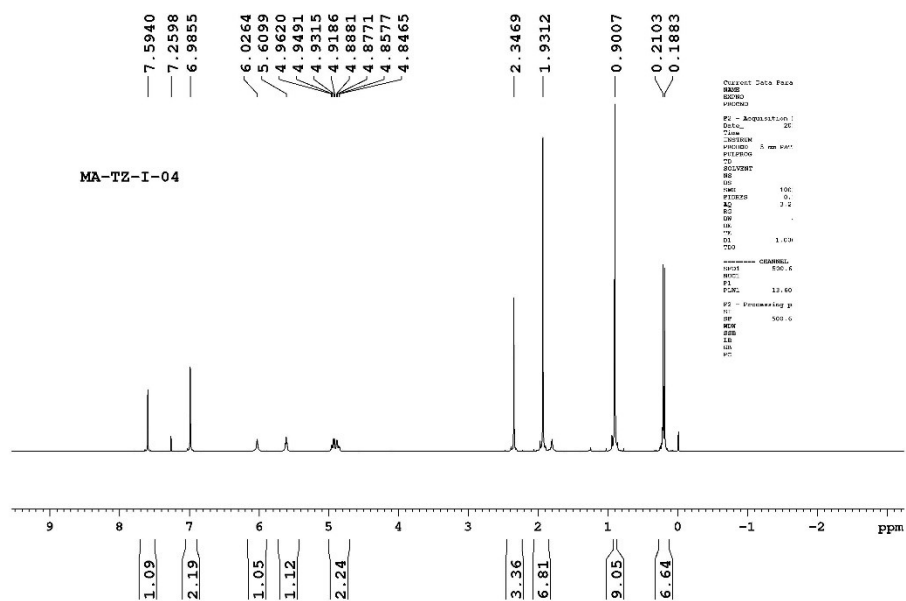

$^1\text{H}$  NMR spectrum of compound **9h**

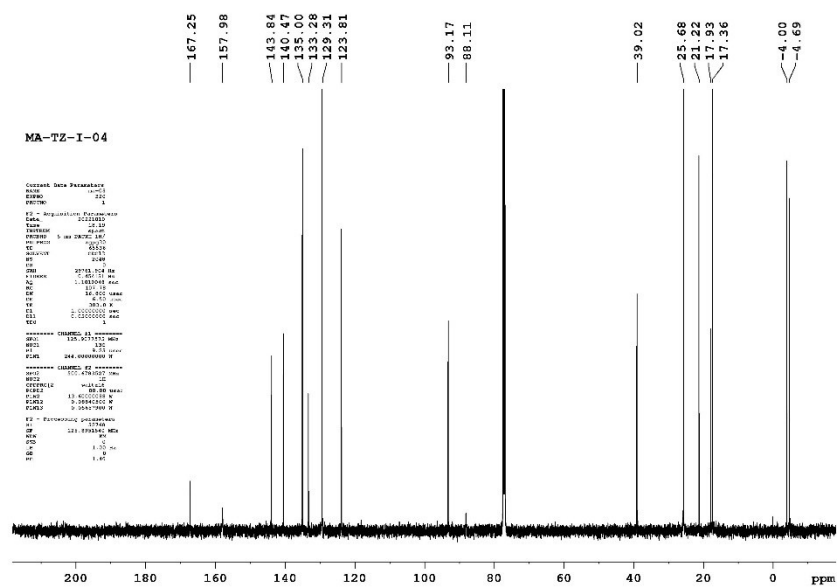

$^{13}\text{C}$  NMR spectrum of compound **9h**



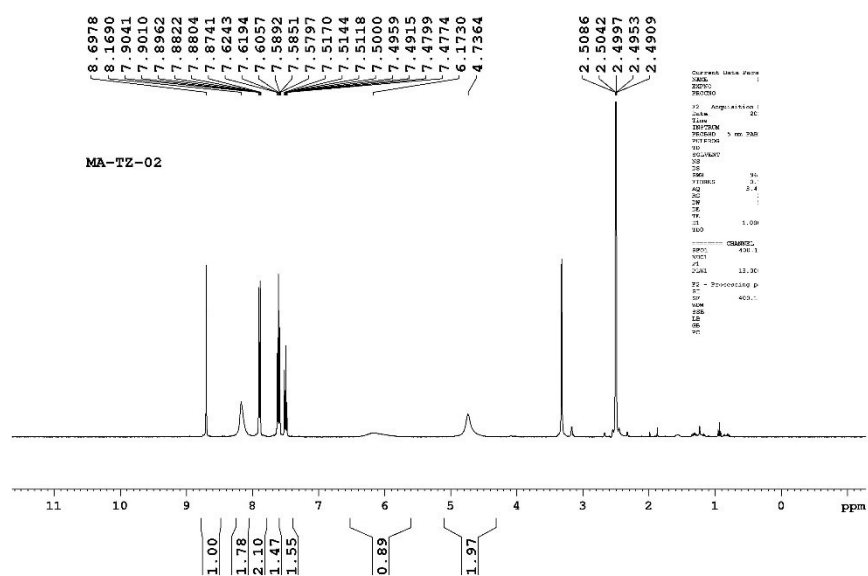

<sup>1</sup>H NMR spectrum of compound **10b**

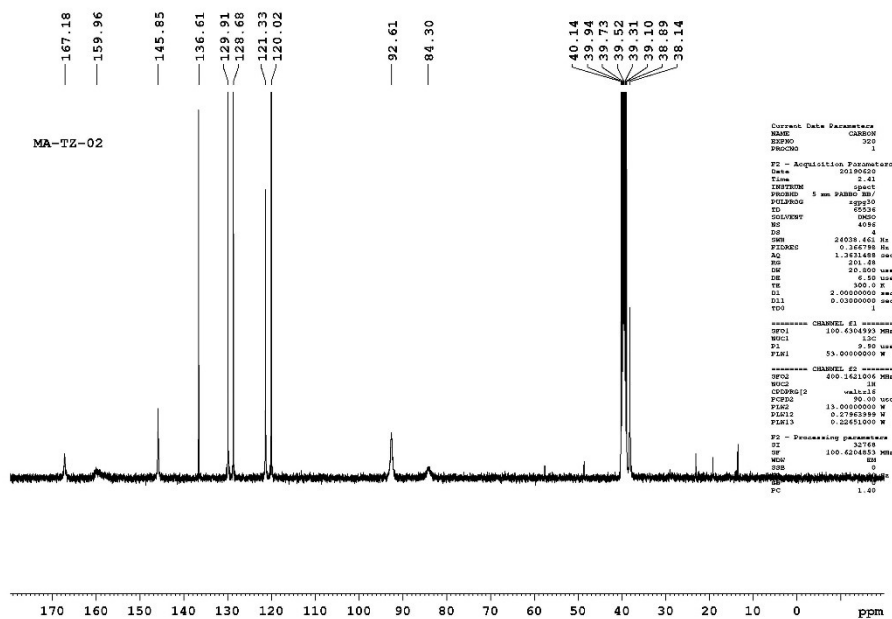

<sup>13</sup>C NMR spectrum of compound **10b**





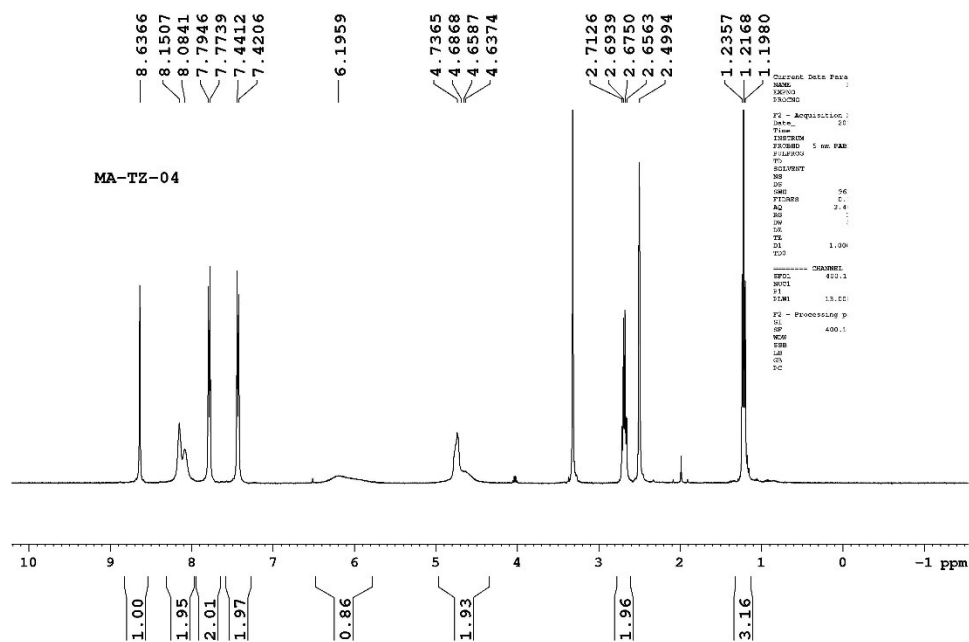

$^1\text{H}$  NMR spectrum of compound **10d**

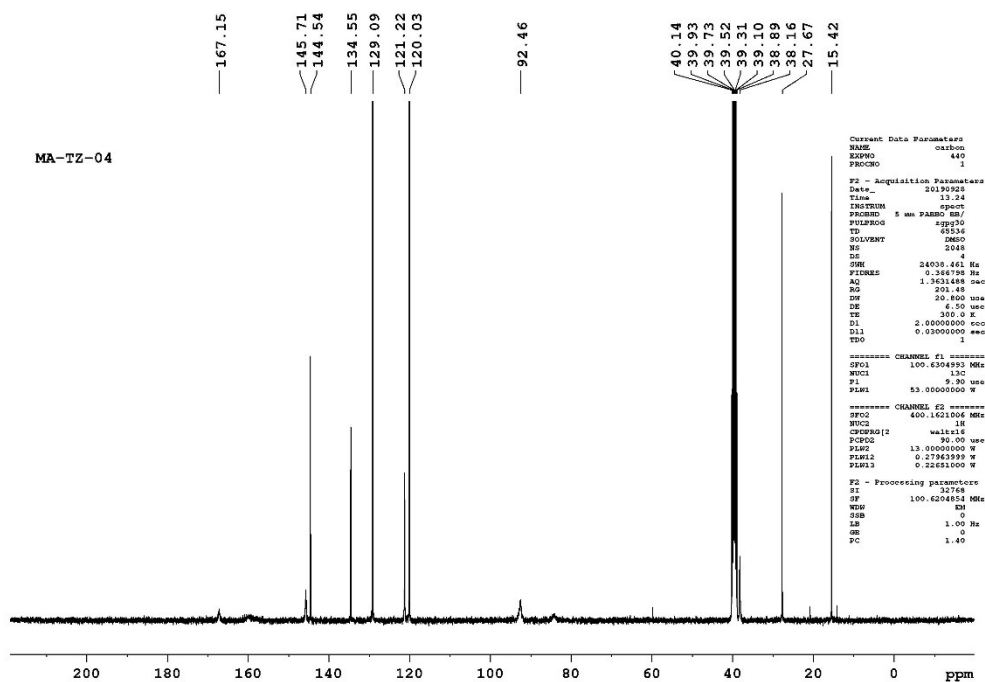

$^{13}\text{C}$  NMR spectrum of compound **10d**

$^1\text{H}$

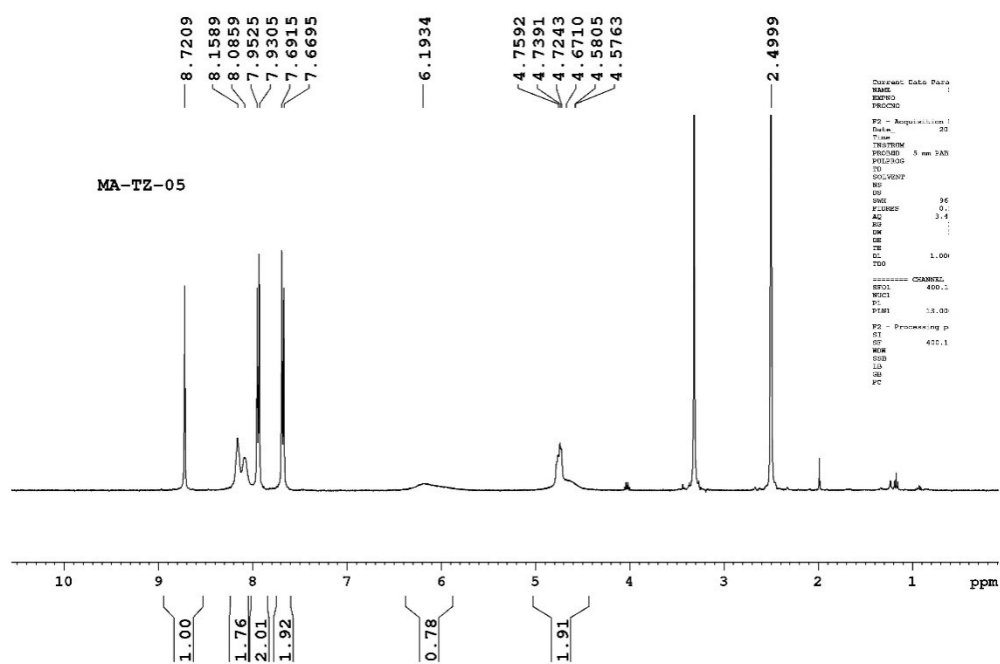

NMR spectrum of compound **10e**

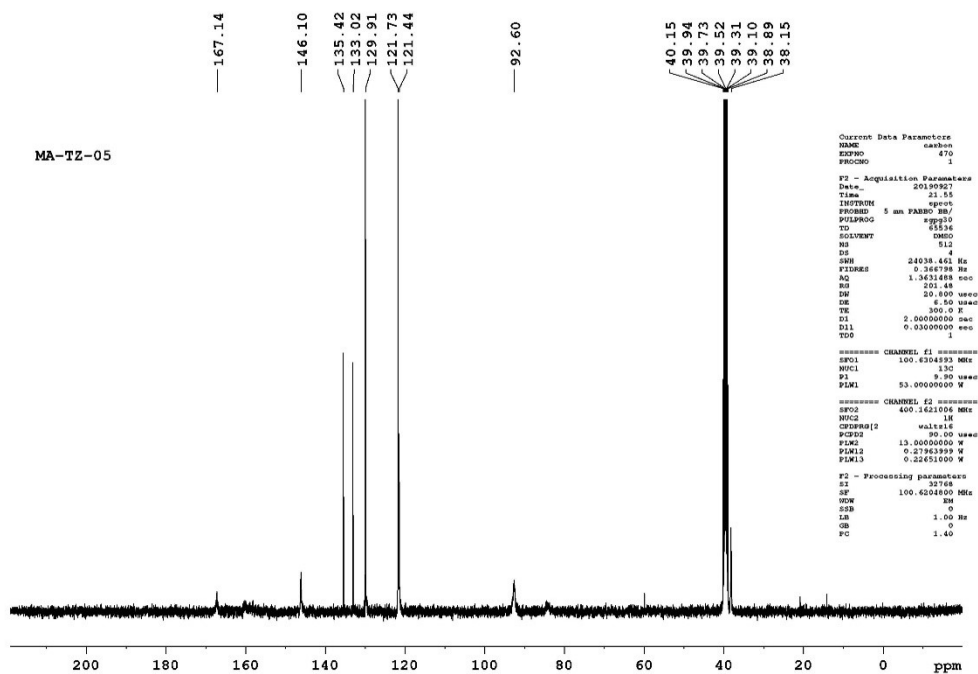

$^{13}\text{C}$  NMR spectrum of compound **10e**

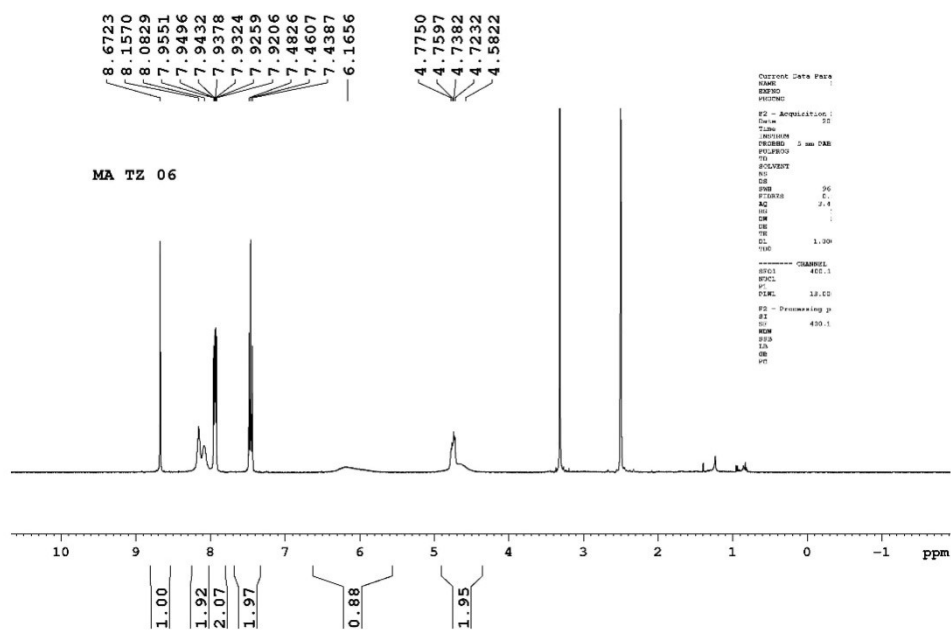

$^1\text{H}$  NMR spectrum of compound **10f**

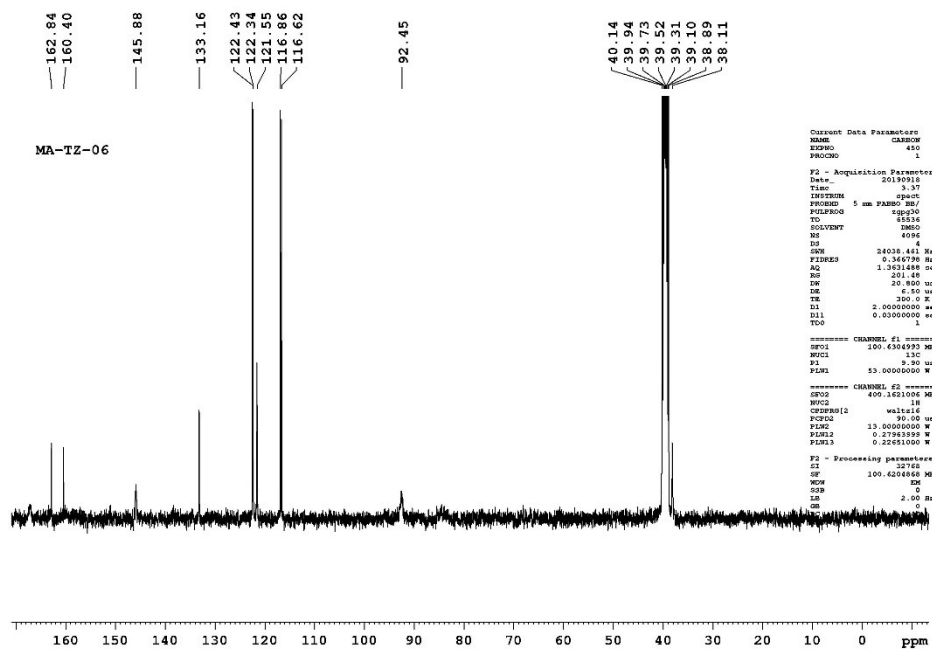

$^{13}\text{C}$  NMR spectrum of compound **10f**

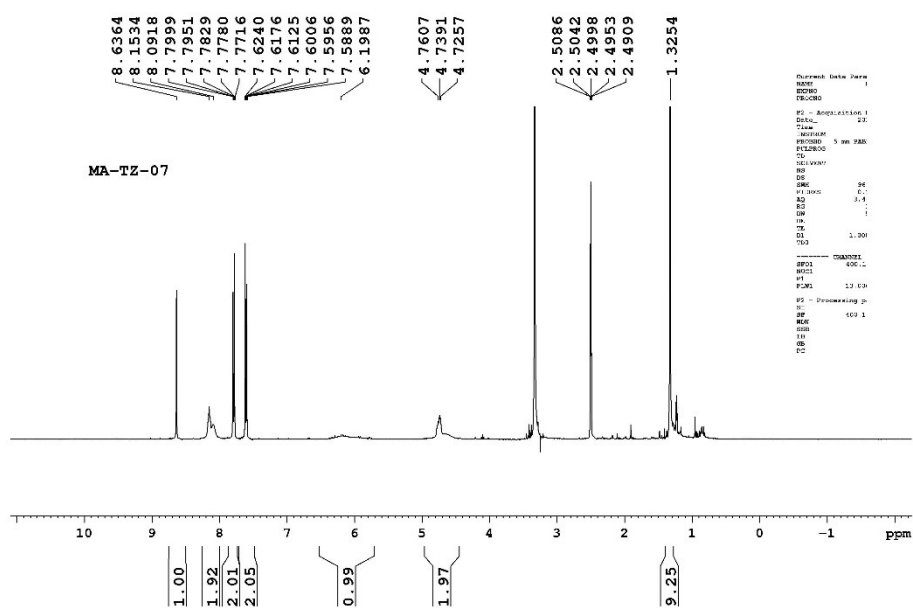

$^1\text{H}$  NMR spectrum of compound **10g**

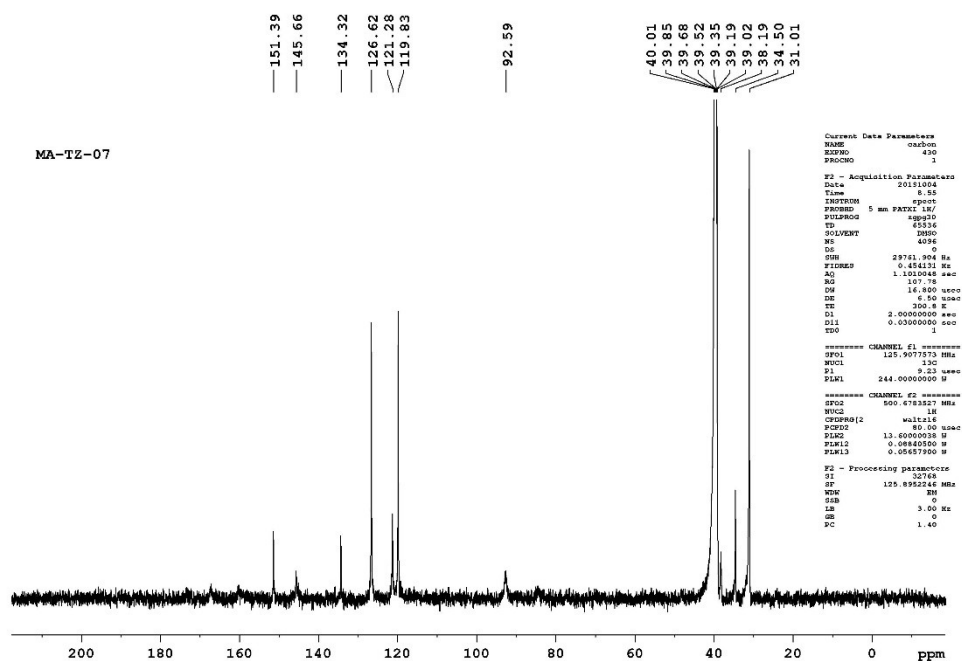

$^{13}\text{C}$  NMR spectrum of compound **10g**

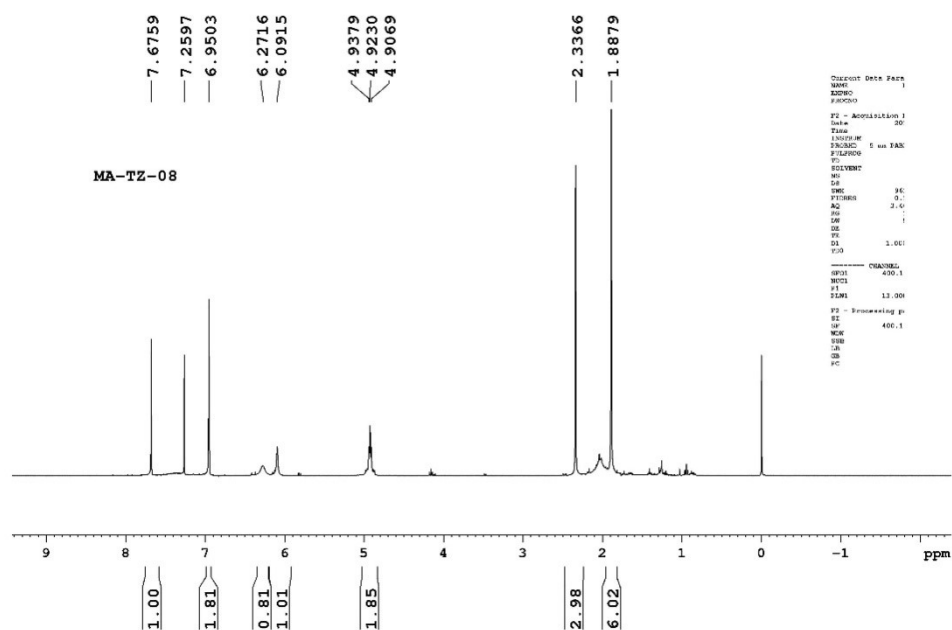

$^1\text{H}$  NMR spectrum of compound **10h**

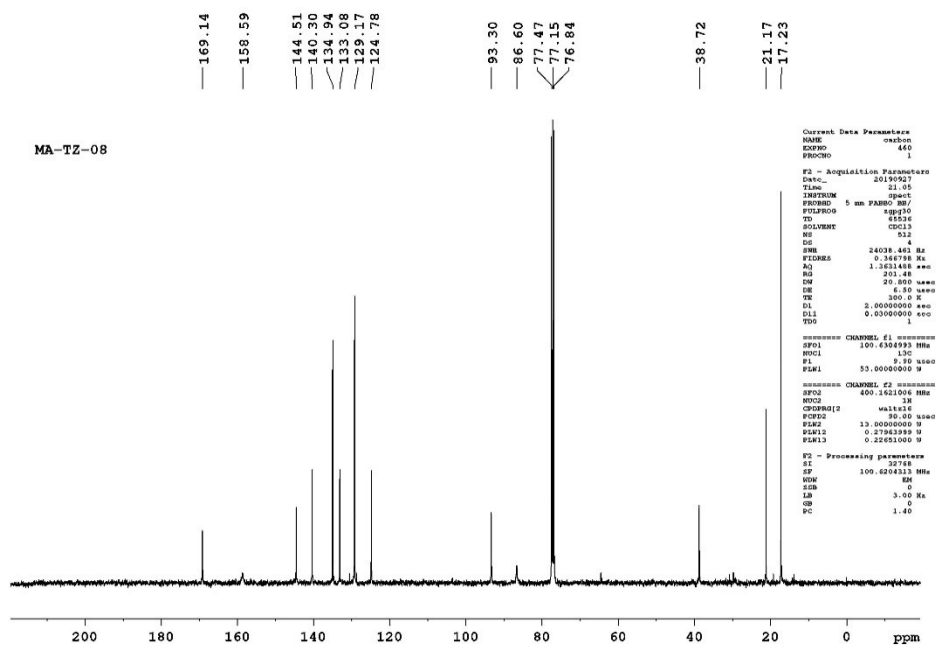

$^{13}\text{C}$  NMR spectrum of compound **10h**

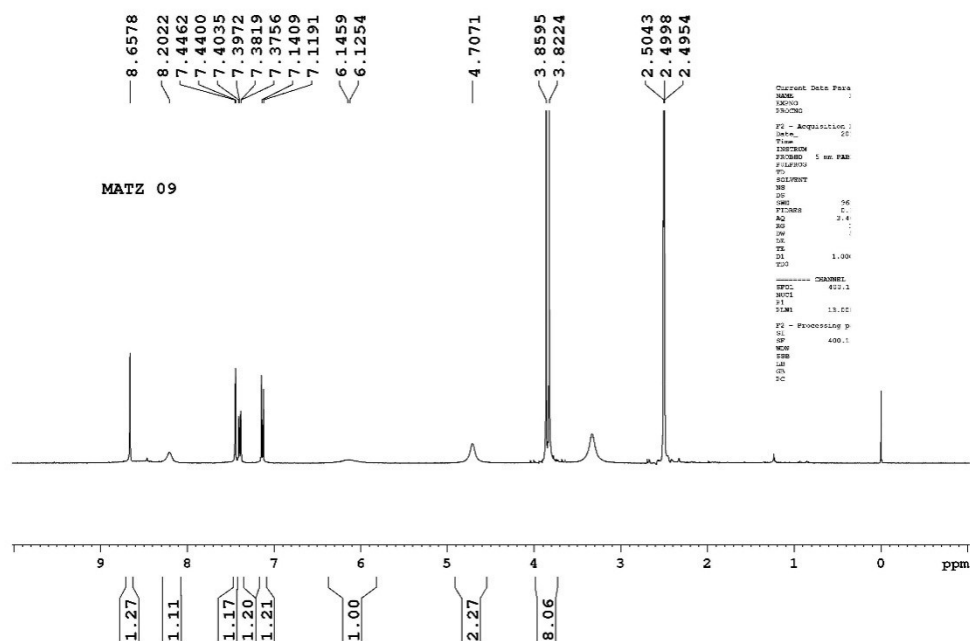

$^1\text{H}$  NMR spectrum of compound **10i**

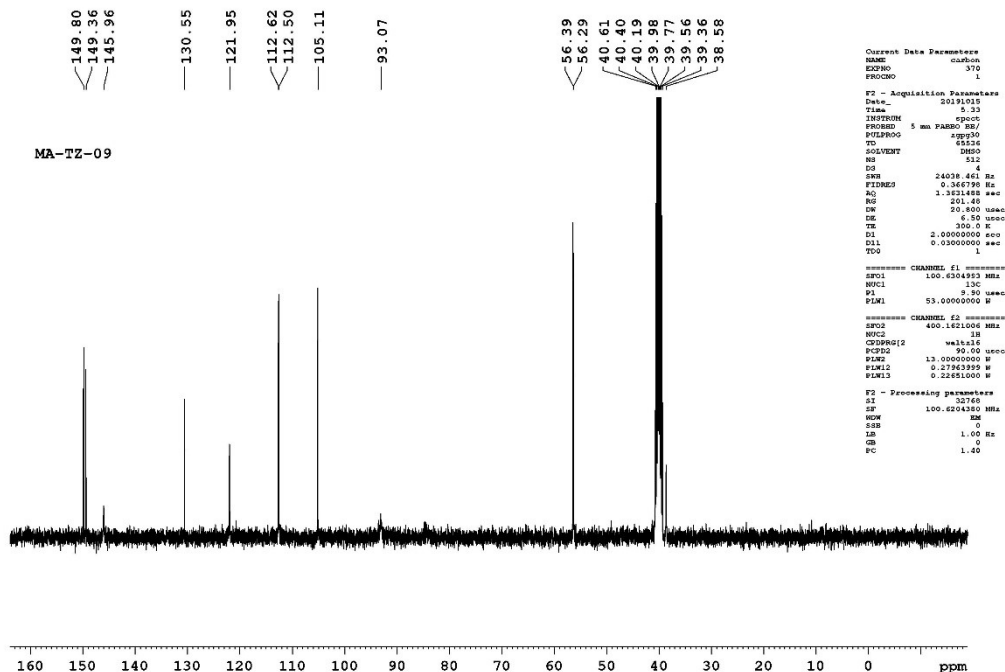

$^{13}\text{C}$  NMR spectrum of compound **10i**

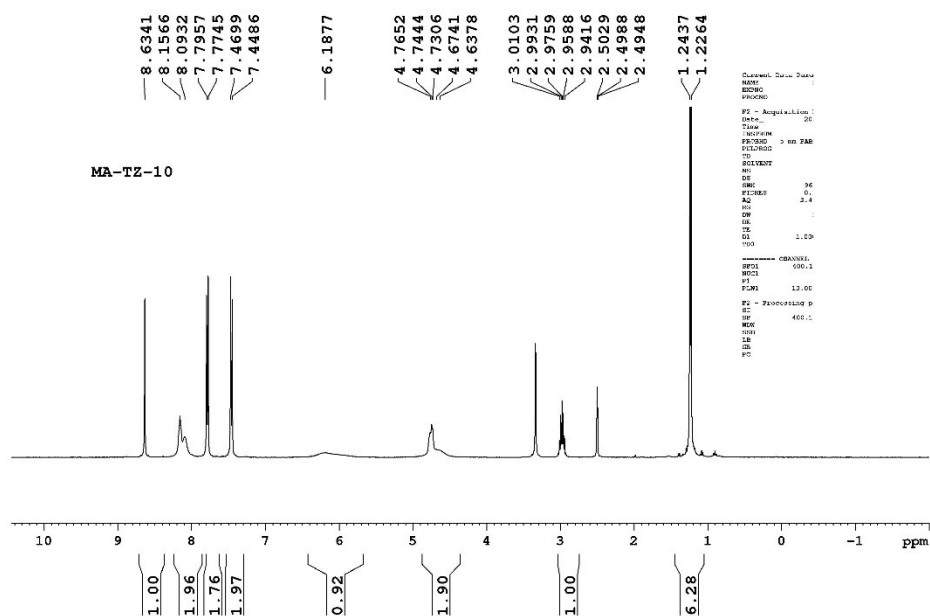

$^1\text{H}$  NMR spectrum of compound **10j**

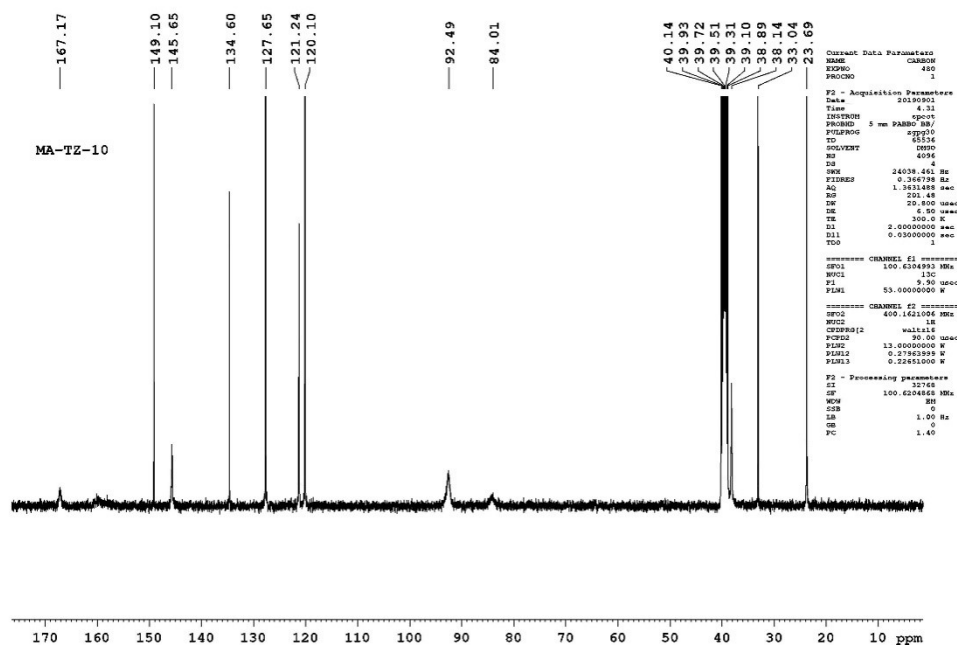

$^{13}\text{C}$  NMR spectrum of compound **10j**







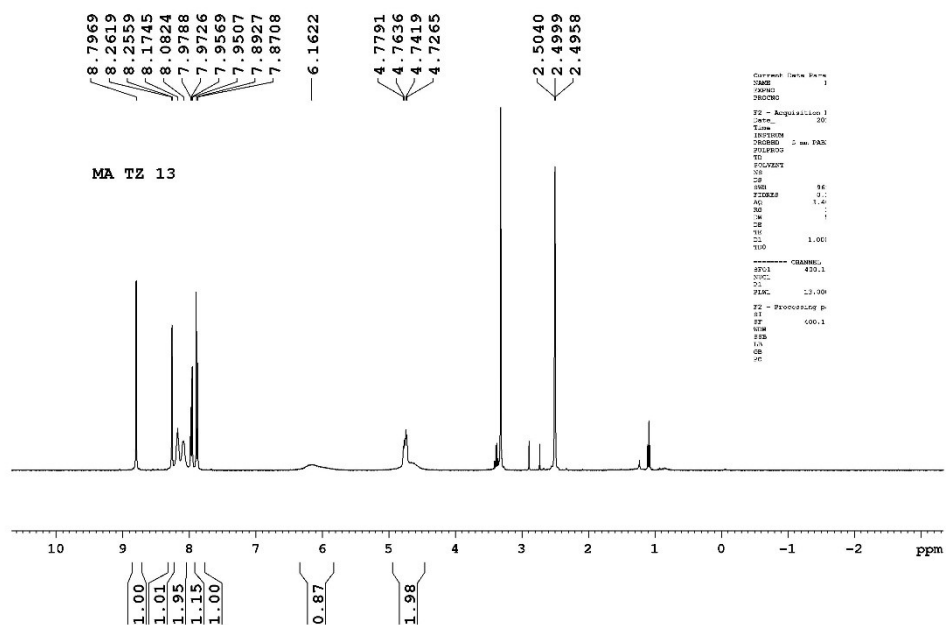

$^1\text{H}$  NMR spectrum of compound **10m**

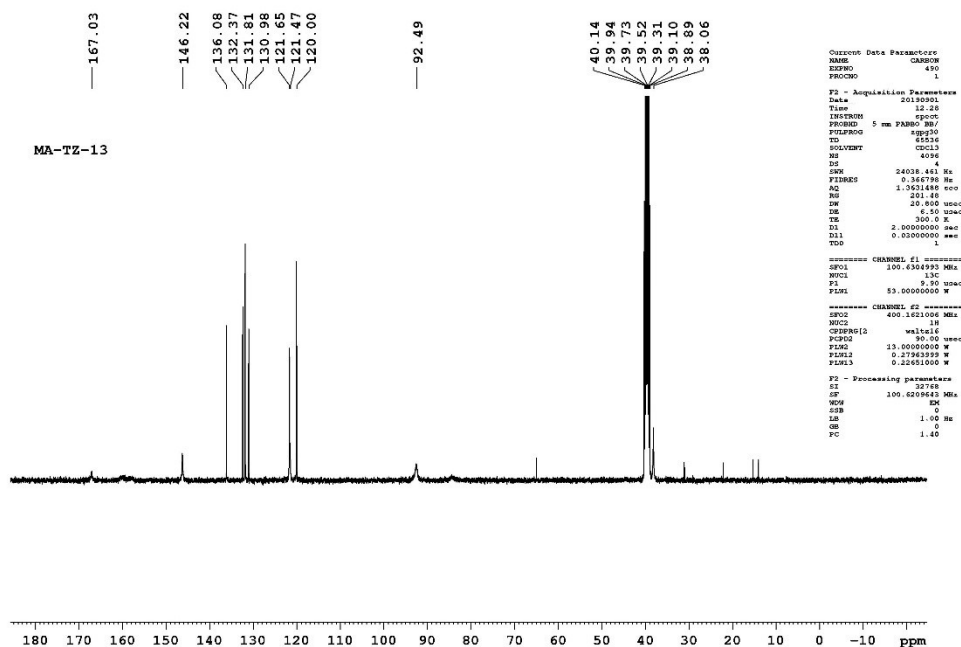

$^{13}\text{C}$  NMR spectrum of compound **10m**

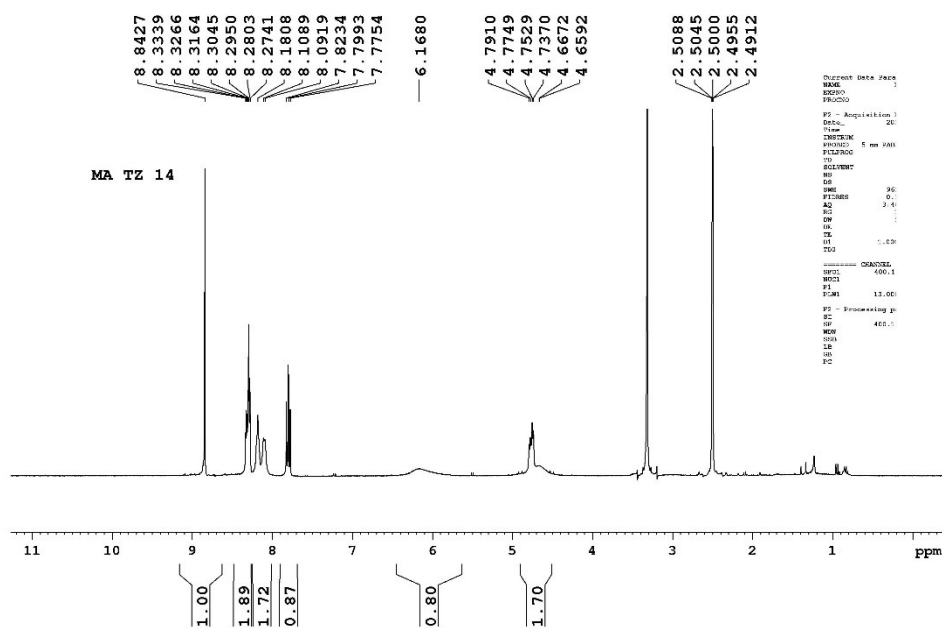

$^1\text{H}$  NMR spectrum of compound **10n**

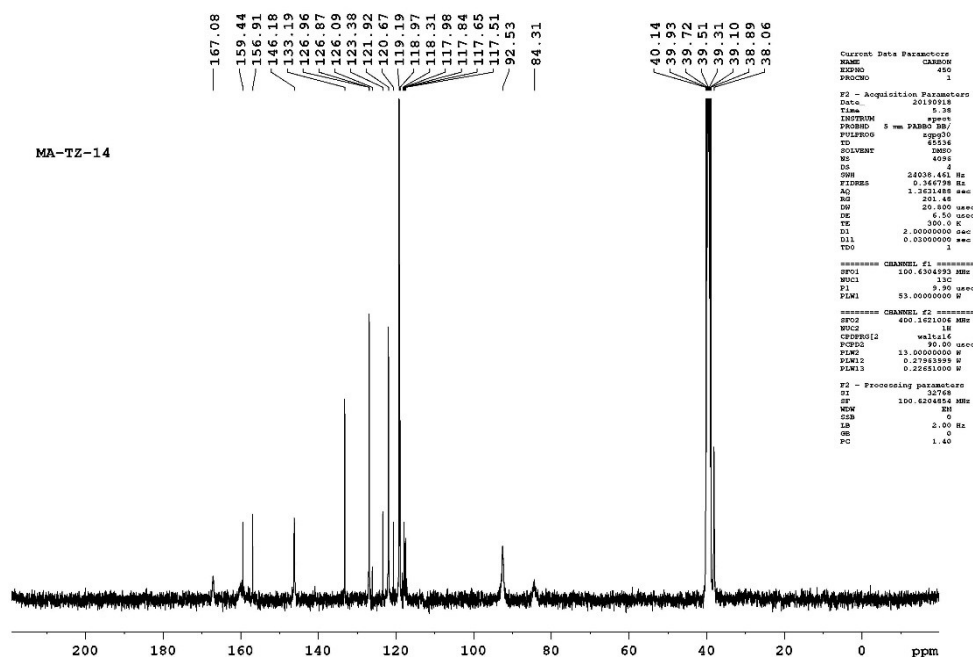

$^{13}\text{C}$  NMR spectrum of compound **10n**



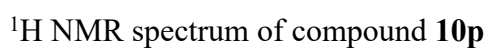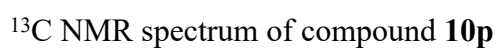

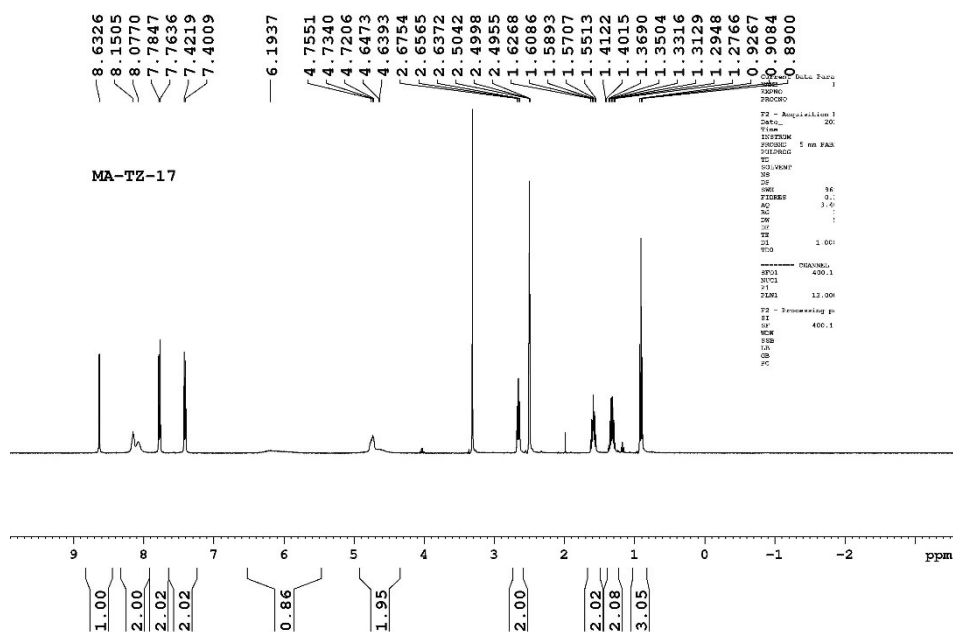

<sup>1</sup>H NMR spectrum of compound 10q

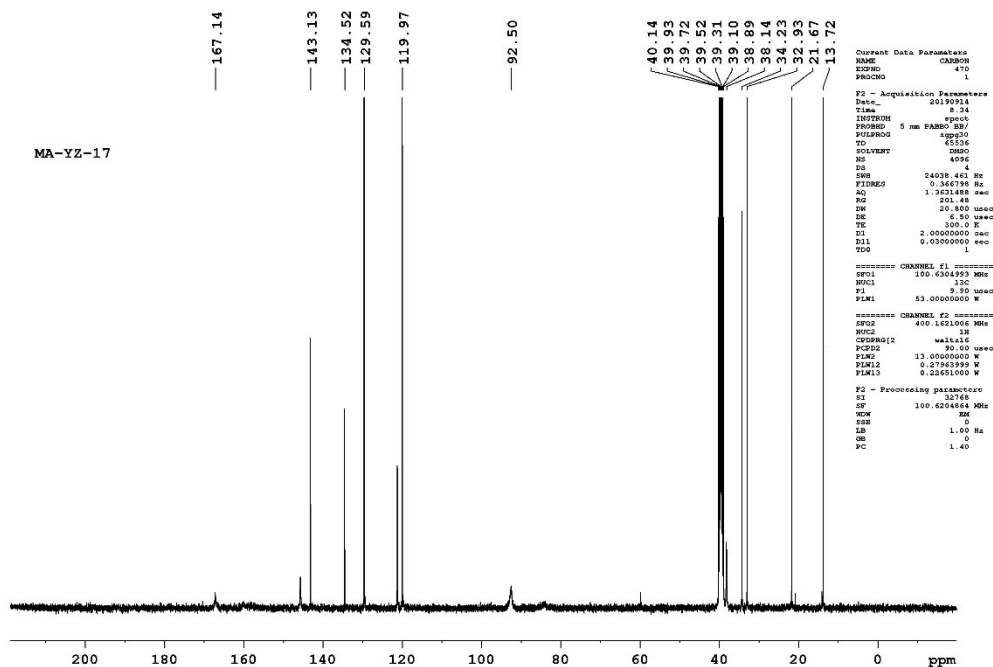

<sup>13</sup>C NMR spectrum of compound 10q

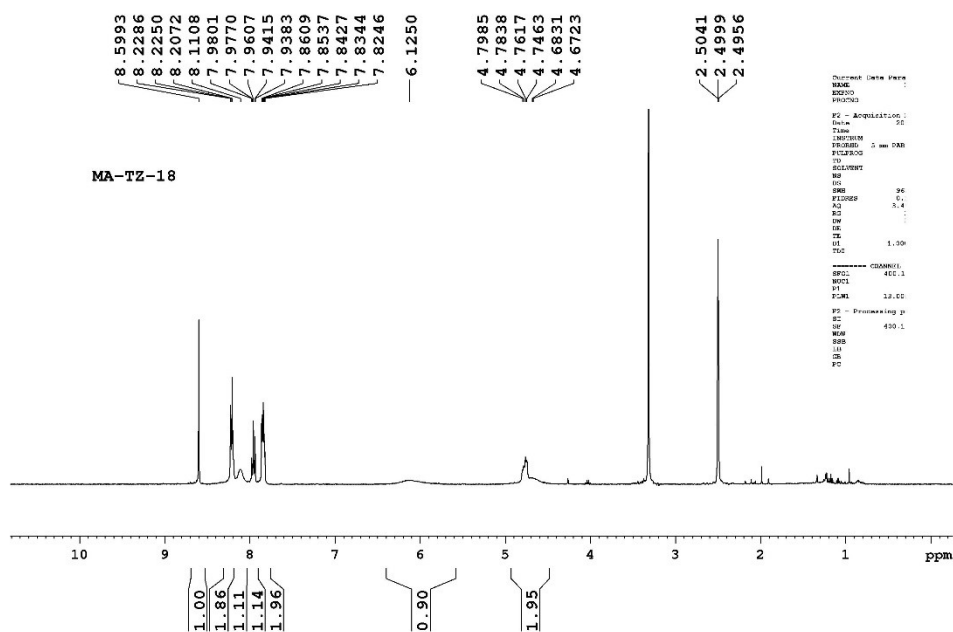

$^1\text{H}$  NMR spectrum of compound **10r**

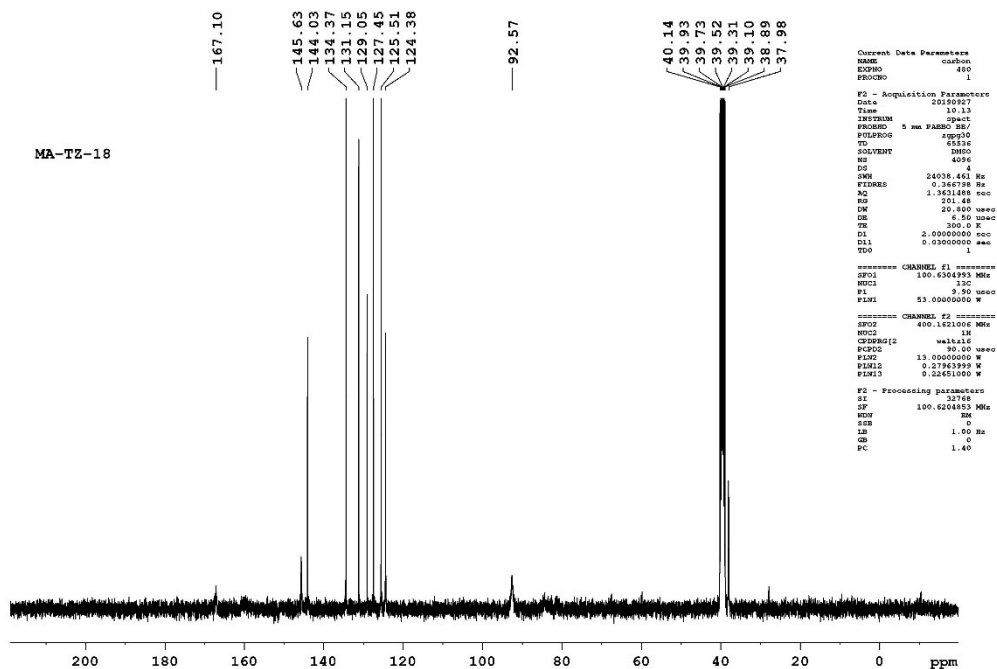

$^{13}\text{C}$  NMR spectrum of compound **10r**

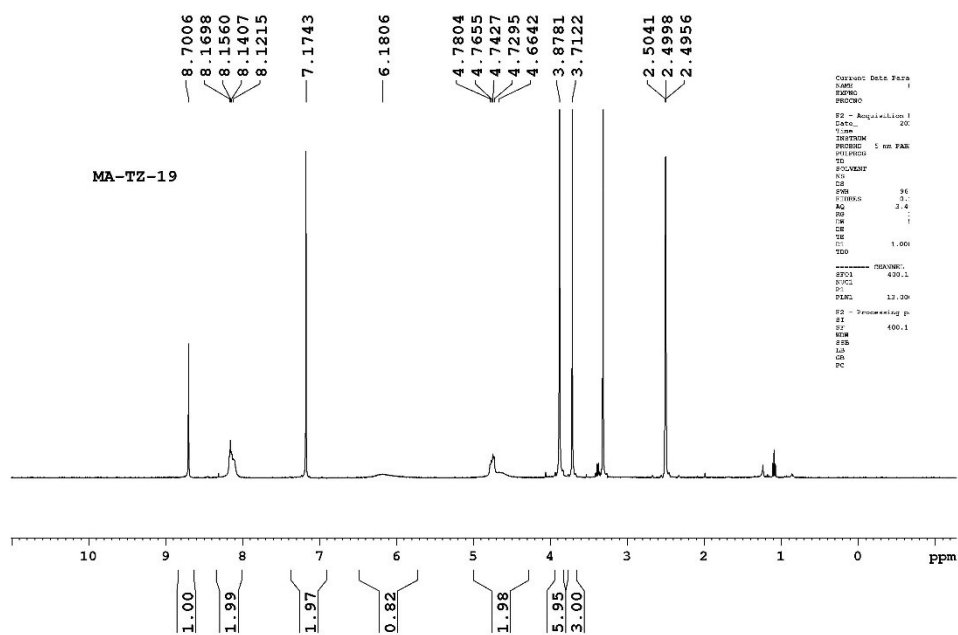

$^1\text{H}$  NMR spectrum of compound **10s**

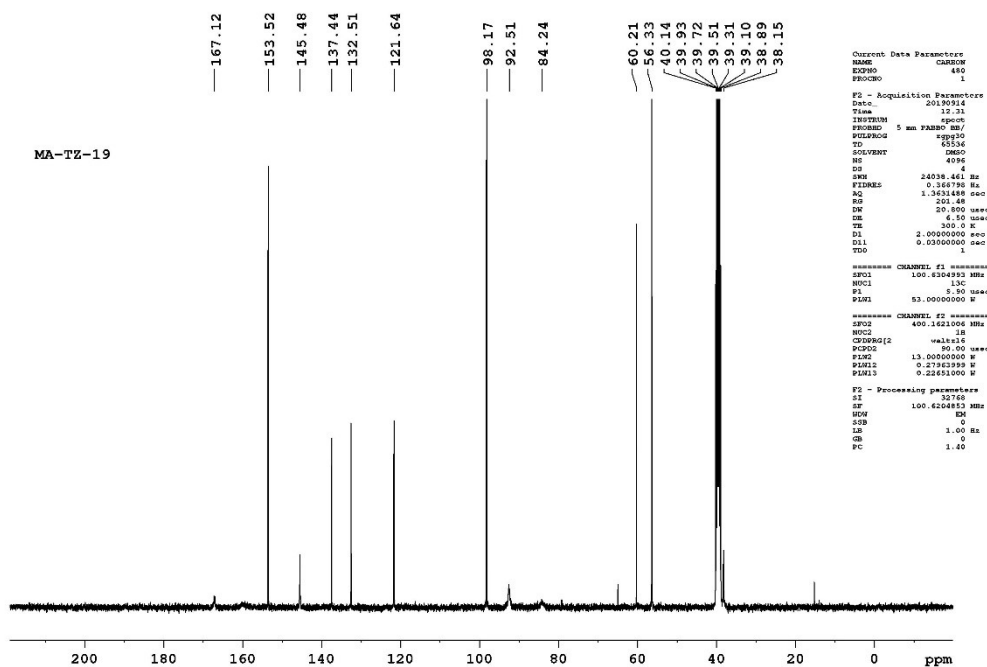

NMR spectrum of compound **10s**



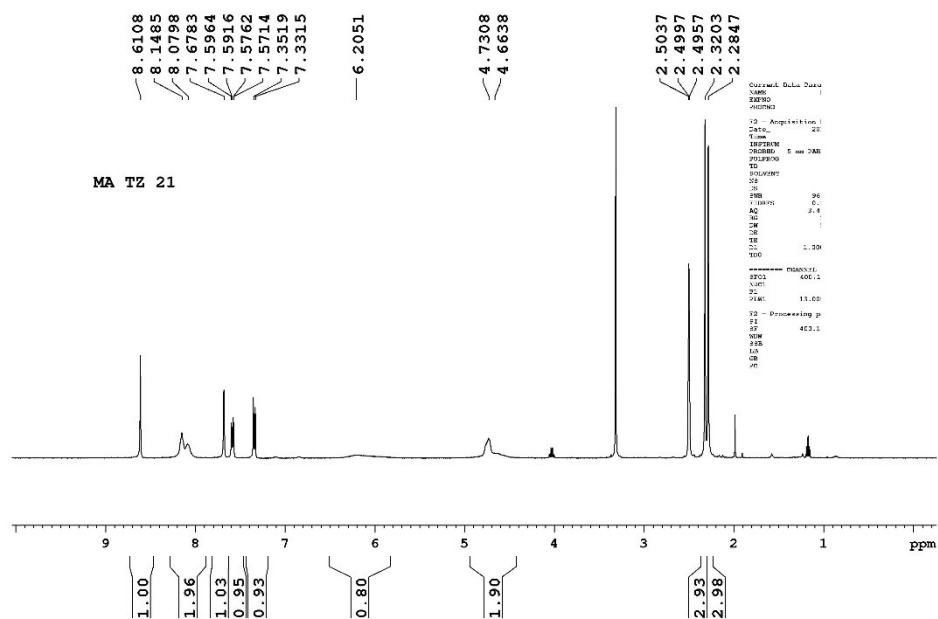

$^1\text{H}$  NMR spectrum of compound **10t**

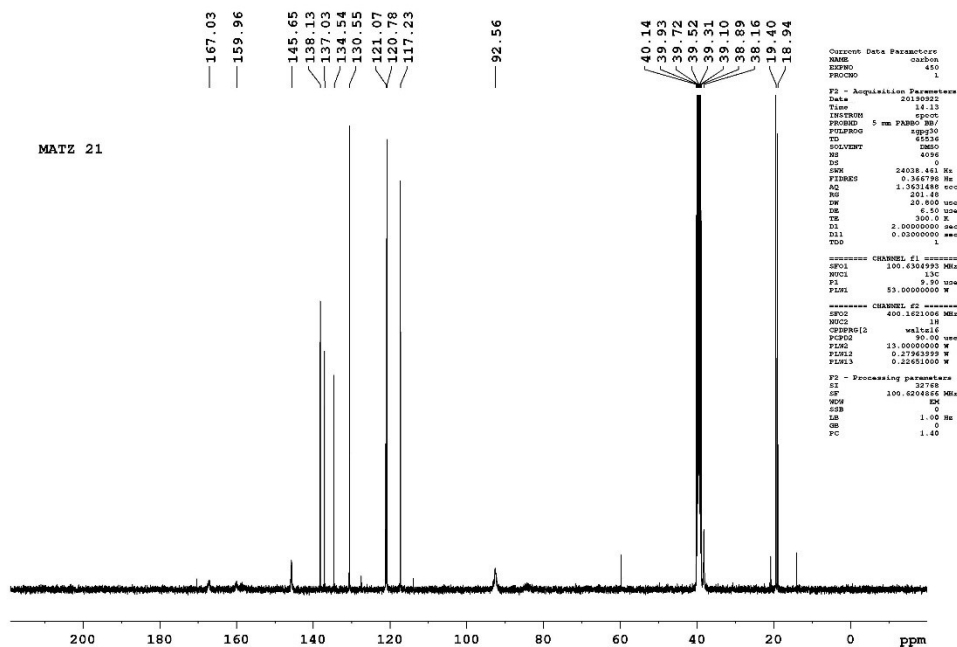

$^{13}\text{C}$  NMR spectrum of compound **10t**

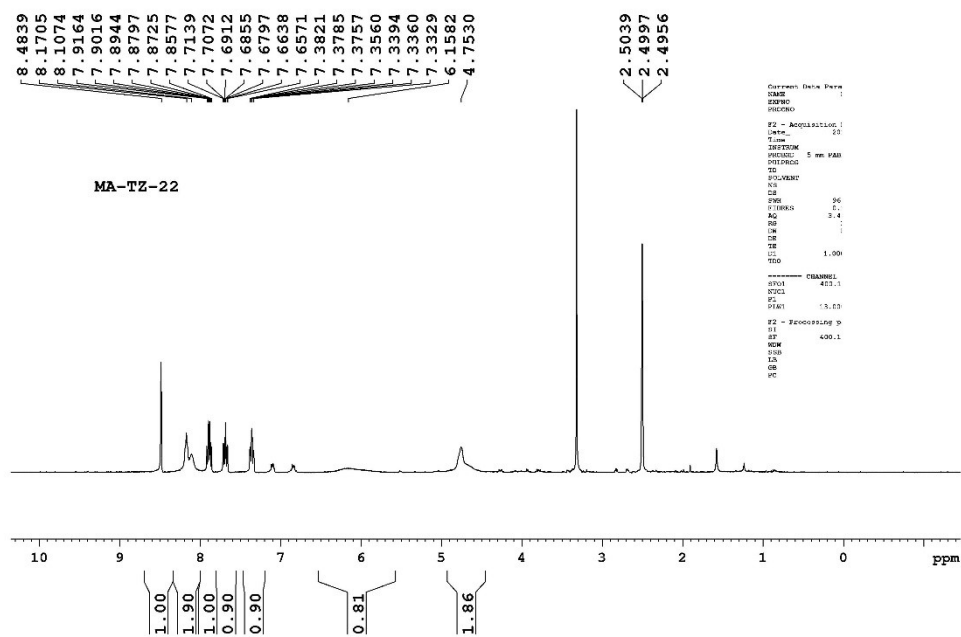

<sup>1</sup>H NMR spectrum of compound **10u**

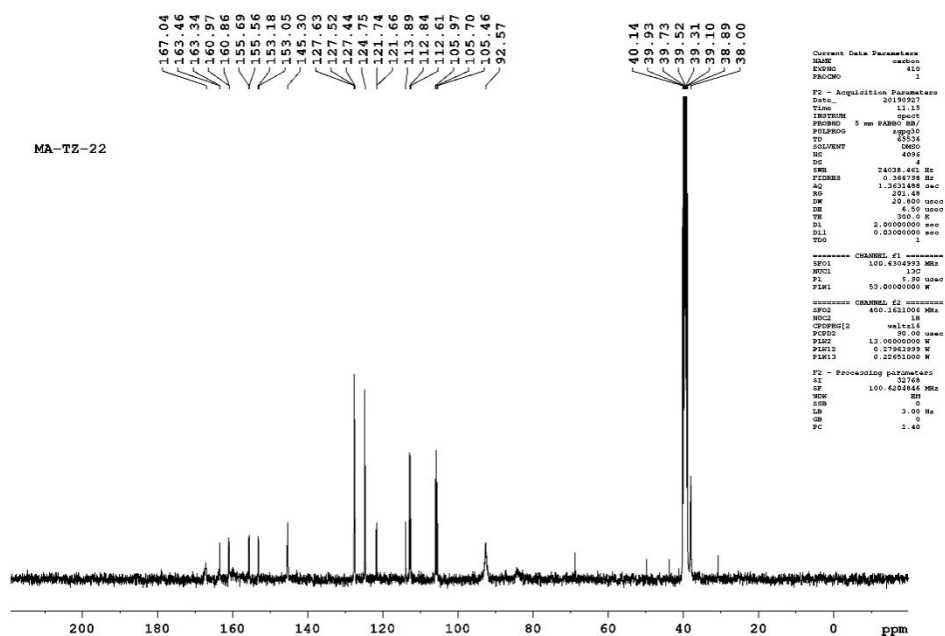

<sup>13</sup>C NMR spectrum of compound **10u**

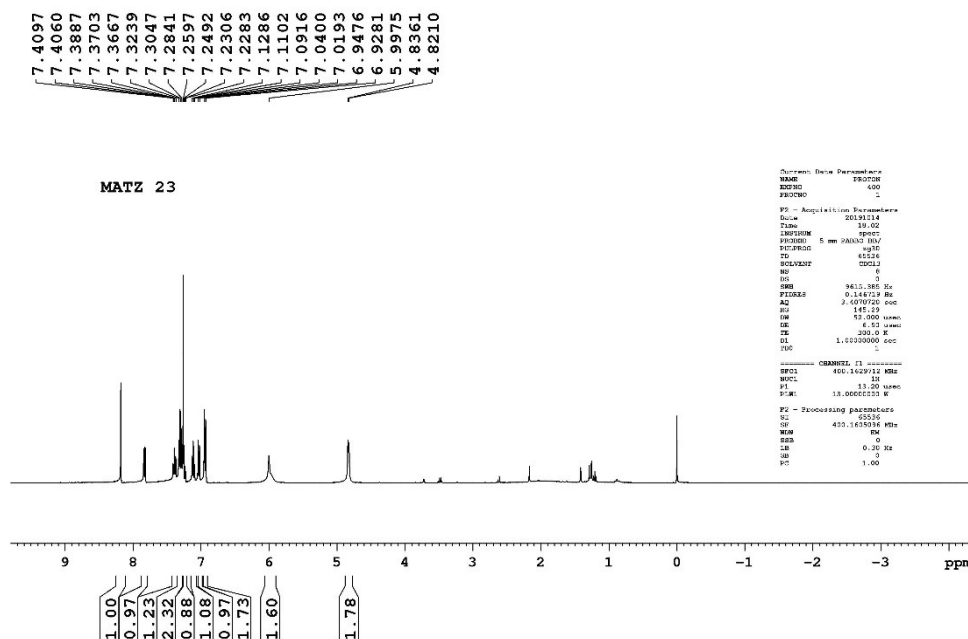

<sup>1</sup>H

NMR spectrum of compound 10v

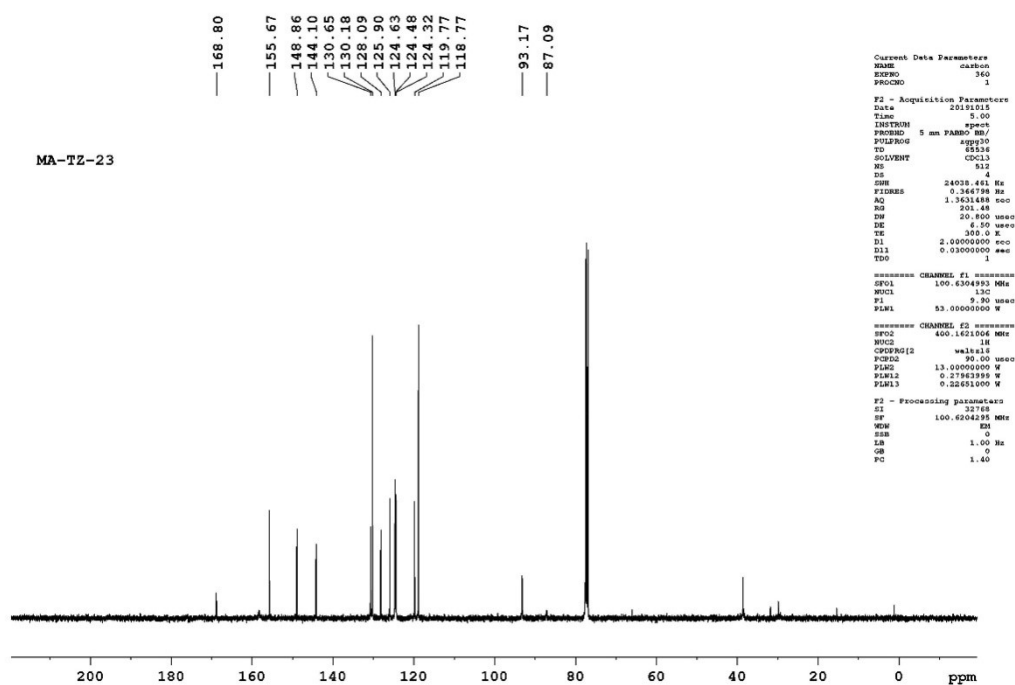

<sup>13</sup>C NMR spectrum of compound 10v

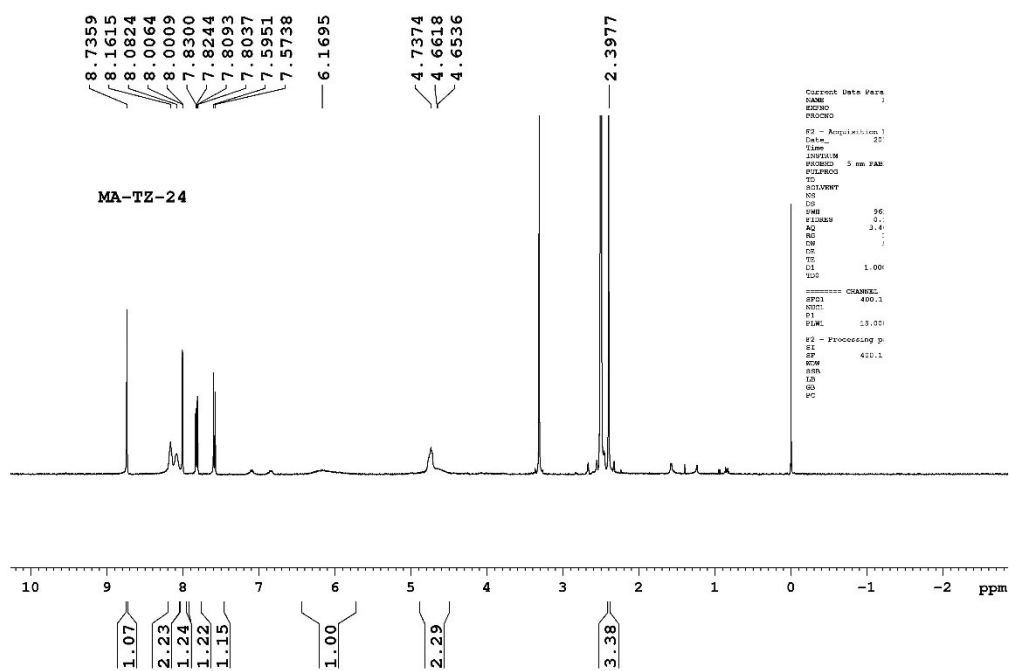

$^1\text{H}$  NMR spectrum of compound **10w**

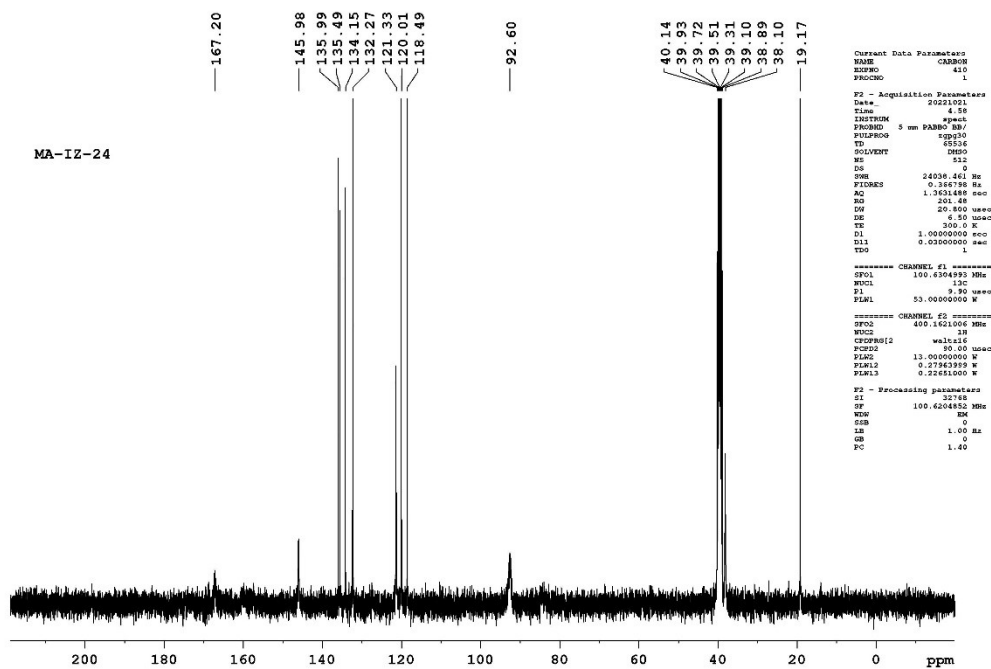

$^{13}\text{C}$  NMR spectrum of compound **10w**

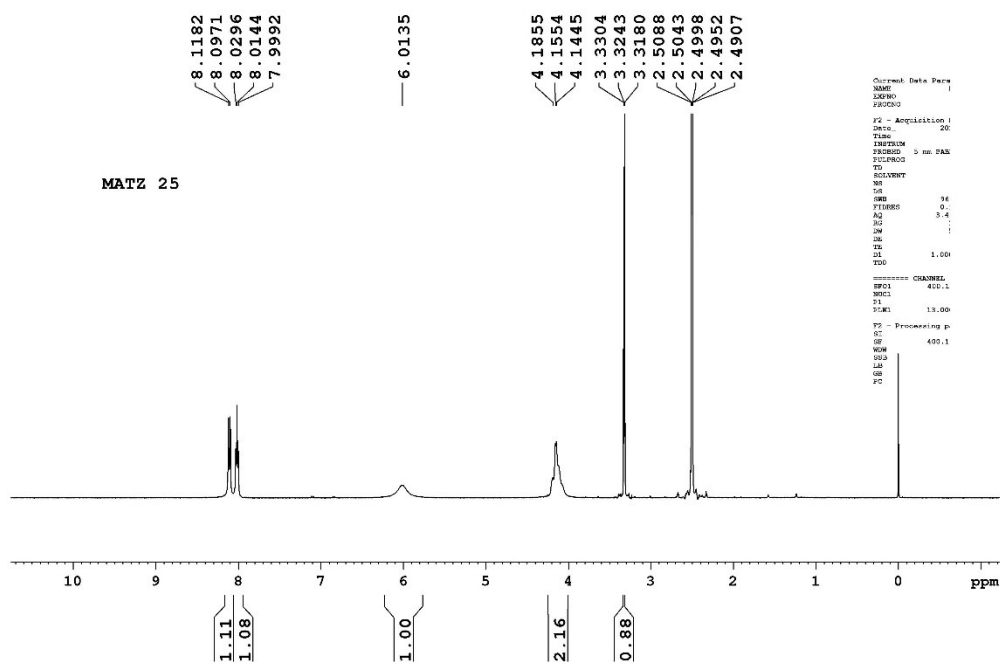

<sup>1</sup>H NMR spectrum of compound 11a

<sup>13</sup>C NMR spectrum of compound 11a

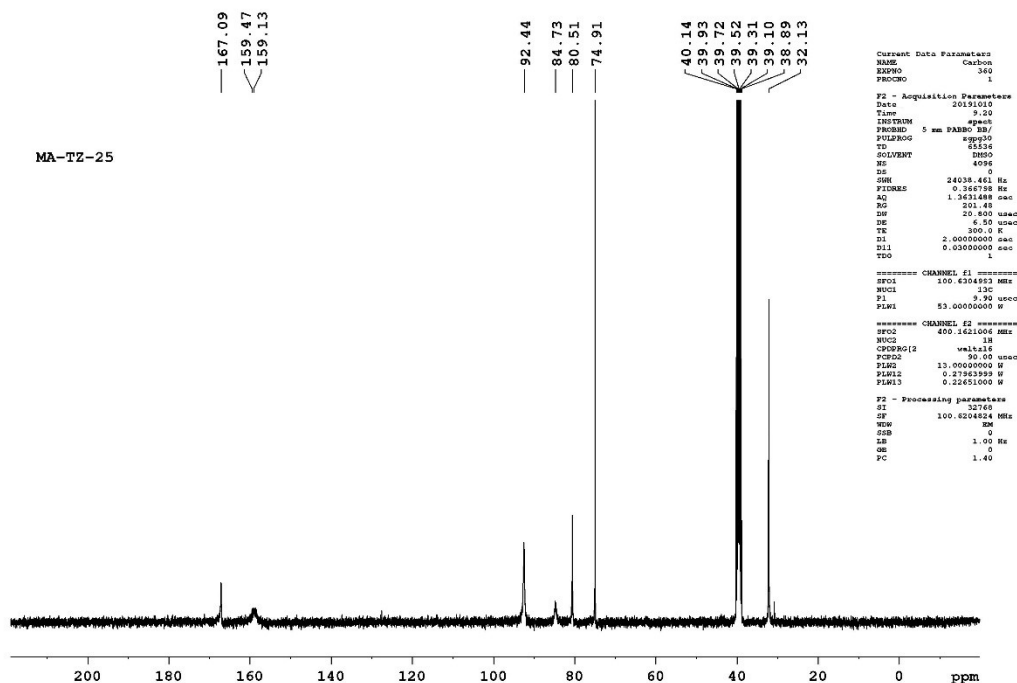

## HRMS spectra of compounds 10a-10w and 11a

D:\INTERNALS\2019\sep2019\HRMS19I19SEP08

9/19/2019 12:25:12 PM

MA-TZ-01

HRMS19I19SEP08 #9 RT: 0.13 AV: 1 SB: 5 0.02-0.08 NL: 5.11E5  
T: FTMS + p ESI Full ms [100.00-2000.00]

D:\INTERNALS\2019\sep2019\HRMS19I19SEP09

9/19/2019 12:27:11 PM

MA-TZ-02

HRMS19I19SEP09 #10 RT: 0.15 AV: 1 SB: 5 0.02-0.08 NL: 6.73E5  
T: FTMS + p ESI Full ms [100.00-2000.00]

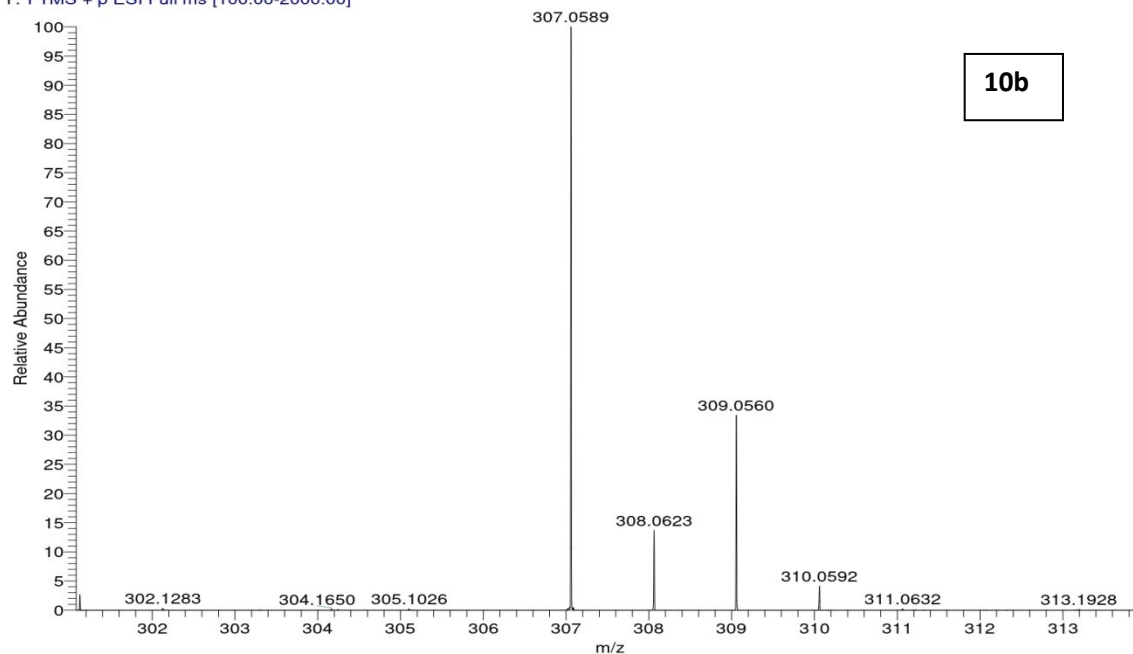

D:\INTERNALS\2019\sep2019\HRMS19I19SEP10

9/19/2019 12:29:10 PM

MA-TZ-03

HRMS19I19SEP10 #8 RT: 0.12 AV: 1 SB: 5 0.02-0.08 NL: 1.43E6  
T: FTMS + p ESI Full ms [100.00-2000.00]

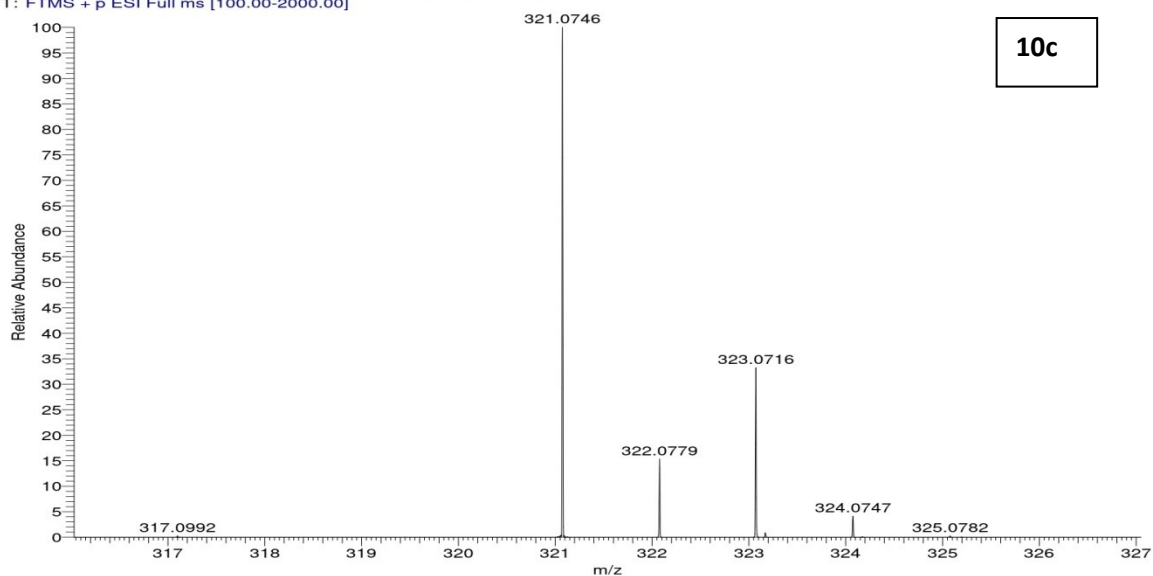

HRMS19\19SEP11 #9 RT: 0.13 AV: 1 SB: 5 0.02-0.08 NL: 1.25E6  
T: FTMS + p ESI Full ms [100.00-2000.00]

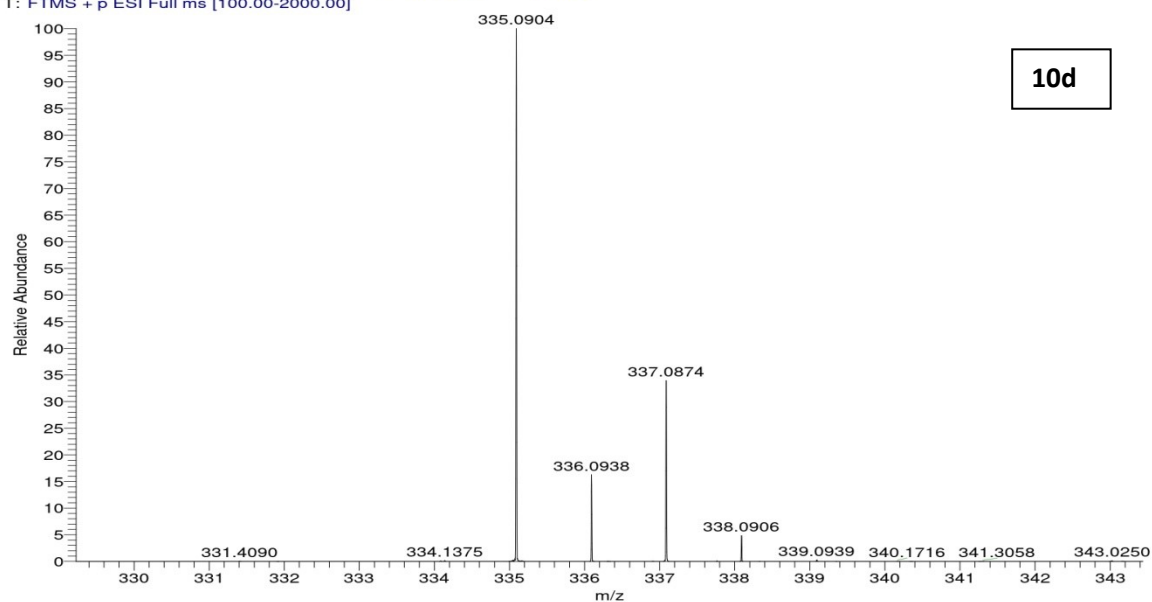**10d****10e**

HRMS19I19SEP12 #9 RT: 0.13 AV: 1 SB: 5 0.02-0.08 NL: 2.34E5  
T: FTMS + p ESI Full ms [100.00-2000.00]

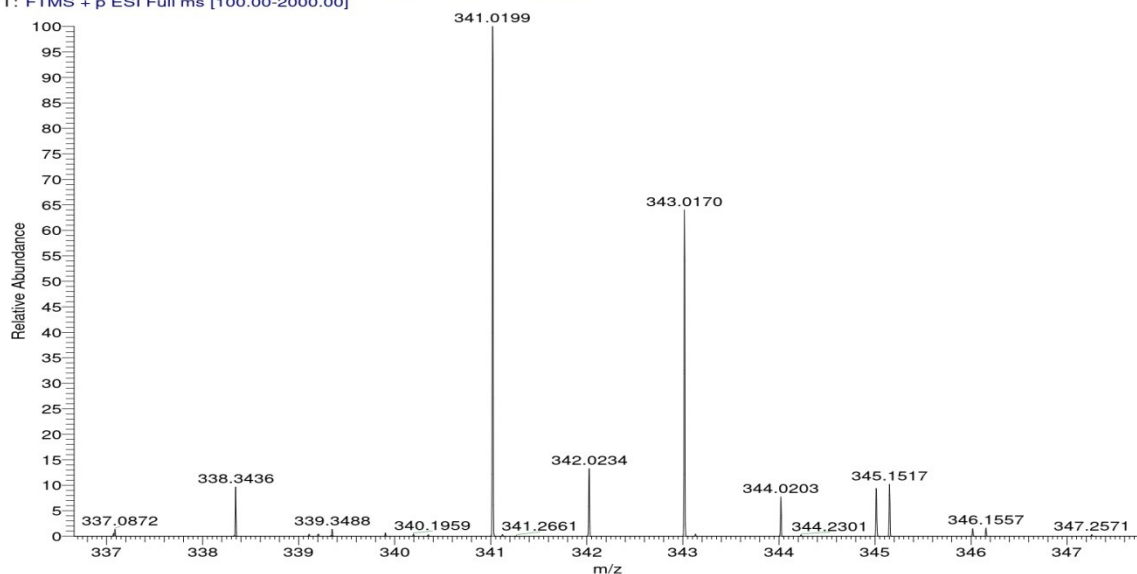

HRMS19I19SEP13 #7 RT: 0.10 AV: 1 SB: 5 0.02-0.08 NL: 5.30E4  
T: FTMS + p ESI Full ms [100.00-2000.00]

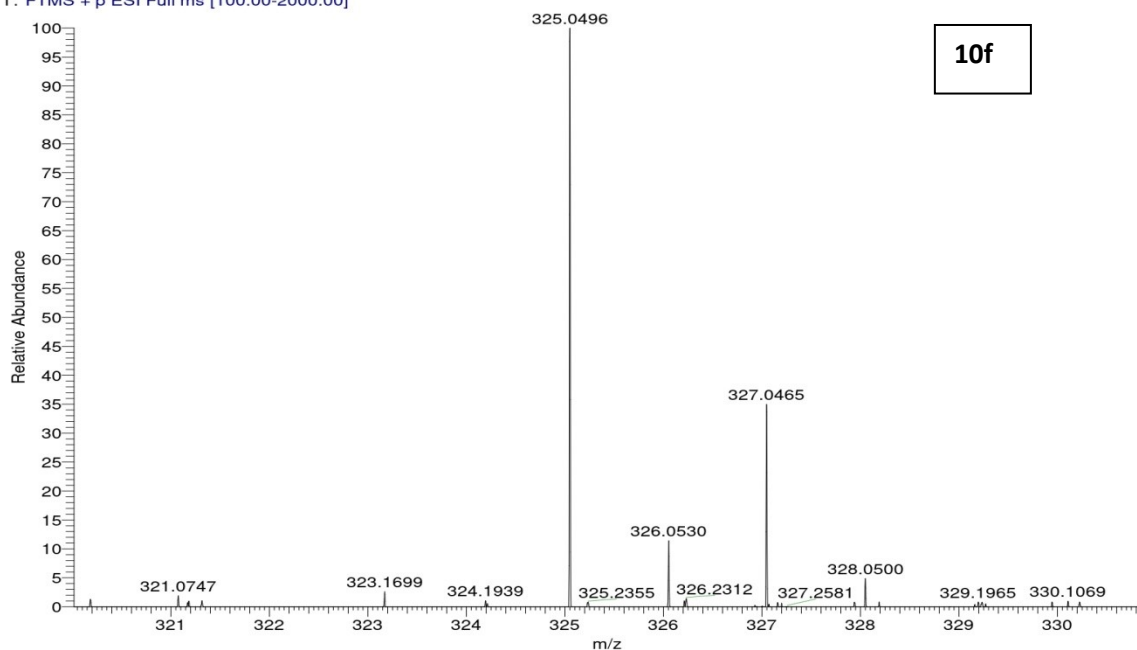



HRMS19I19SEP14 #10 RT: 0.15 AV: 1 SB: 5 0.02-0.08 NL: 3.70E6  
T: FTMS + p ESI Full ms [100.00-2000.00]

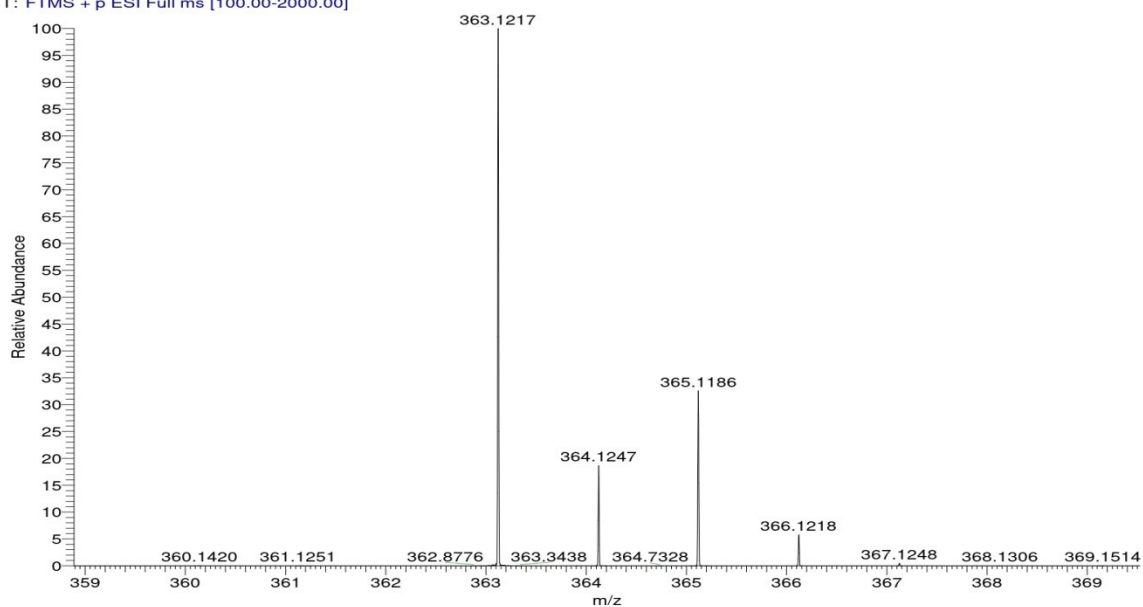

HRMS19I19SEP15 #9 RT: 0.13 AV: 1 SB: 5 0.02-0.08 NL: 1.55E6  
T: FTMS + p ESI Full ms [100.00-2000.00]

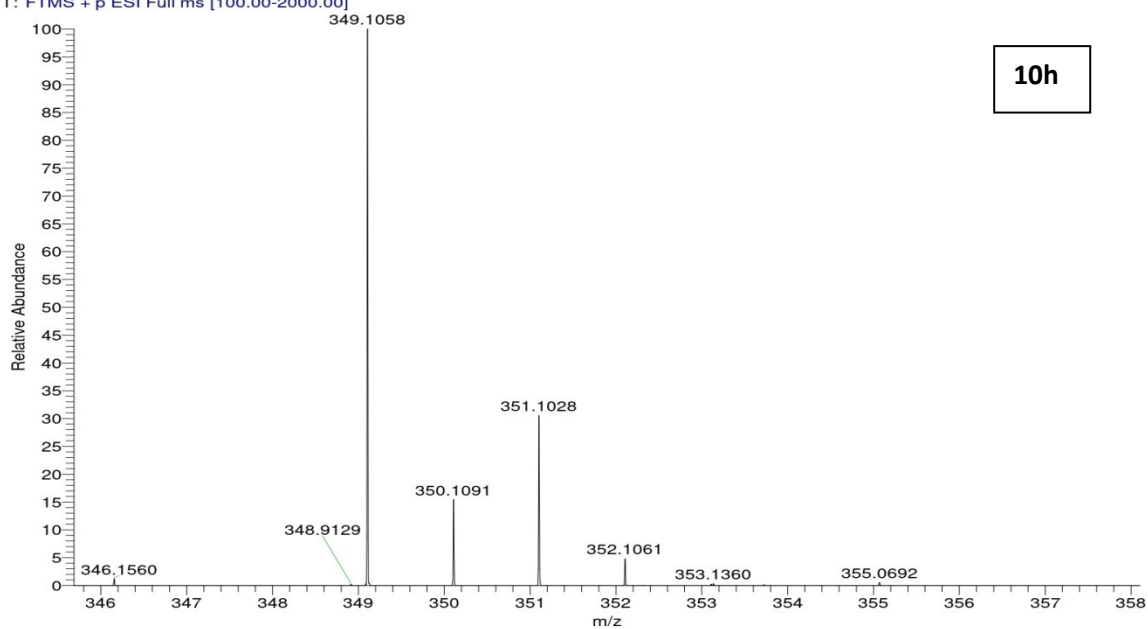

HRMS19I19SEP16 #10 RT: 0.15 AV: 1 SB: 5 0.02-0.08 NL: 5.65E6  
T: FTMS + p ESI Full ms [100.00-2000.00]

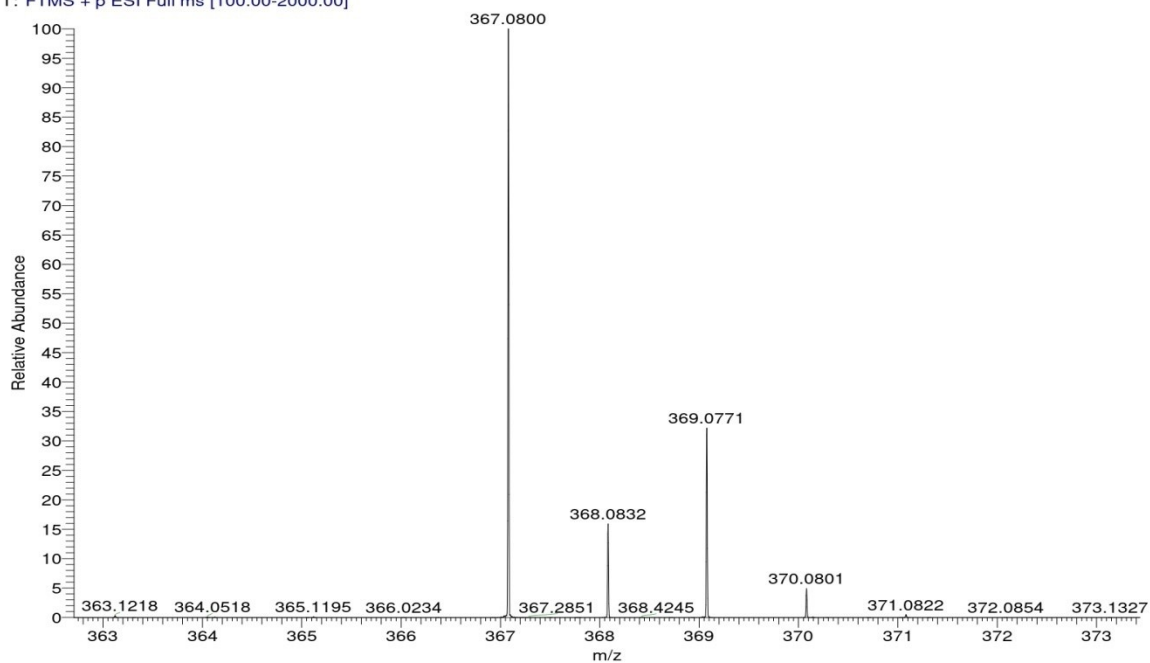

HRMS19I19SEP17 #10 RT: 0.15 AV: 1 SB: 5 0.02-0.08 NL: 1.85E6  
T: FTMS + p ESI Full ms [100.00-2000.00]

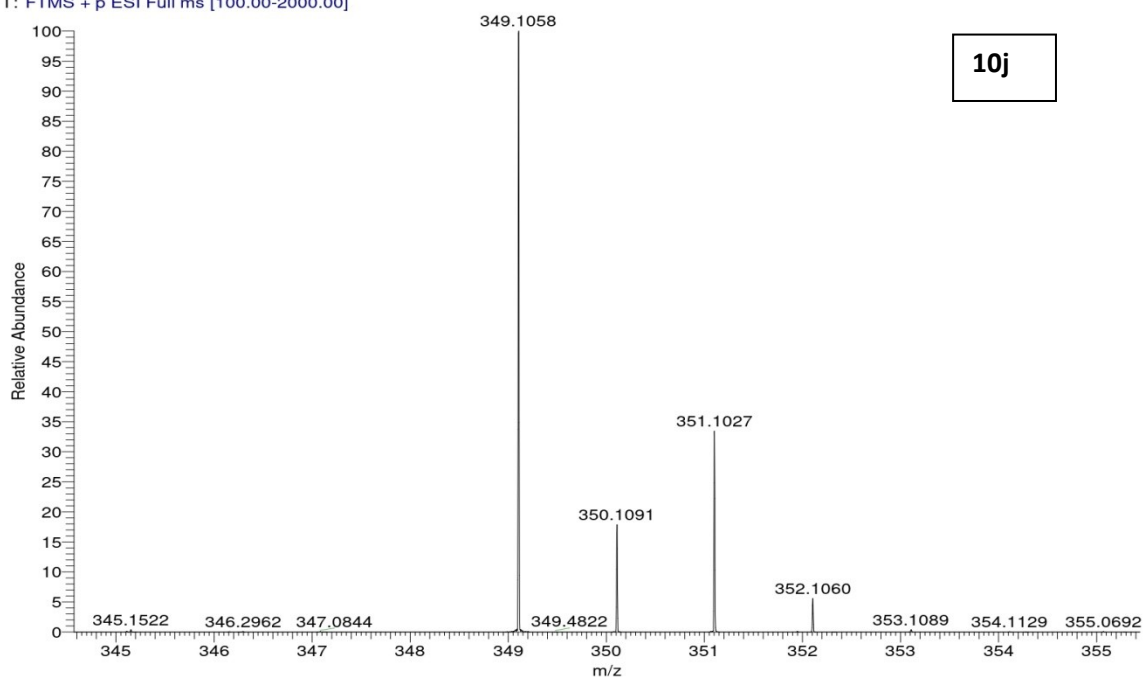

HRMS19\19SEP18 #8 RT: 0.12 AV: 1 SB: 4 0.02-0.07 NL: 1.79E6  
T: FTMS + p ESI Full ms [100.00-2000.00]

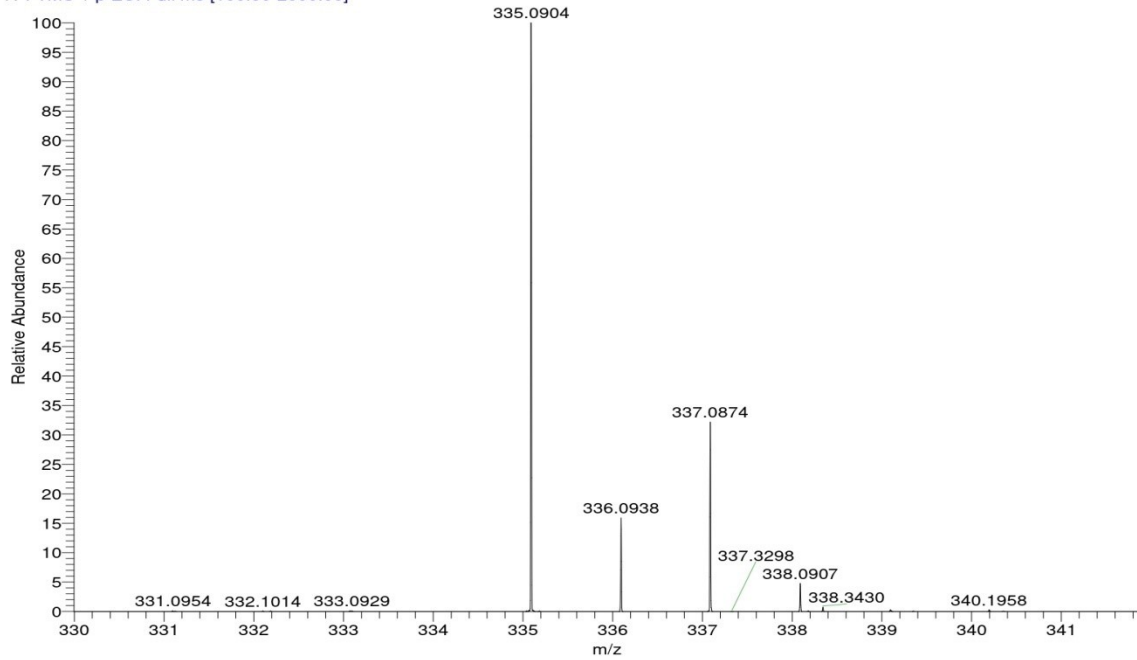

HRMS19\19SEP19 #9 RT: 0.13 AV: 1 SB: 5 0.02-0.08 NL: 2.74E5  
T: FTMS + p ESI Full ms [100.00-2000.00]

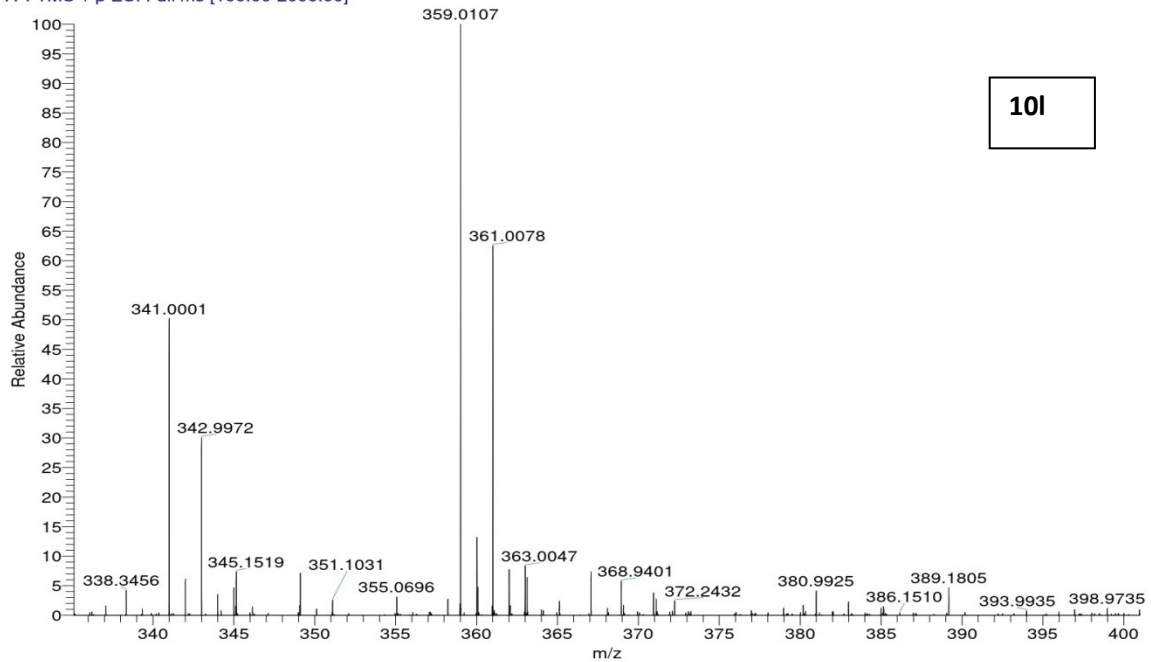

HRMS19I19SEP20 #10 RT: 0.15 AV: 1 SB: 4 0.02-0.07 NL: 1.82E5  
T: FTMS + p ESI Full ms [100.00-2000.00]

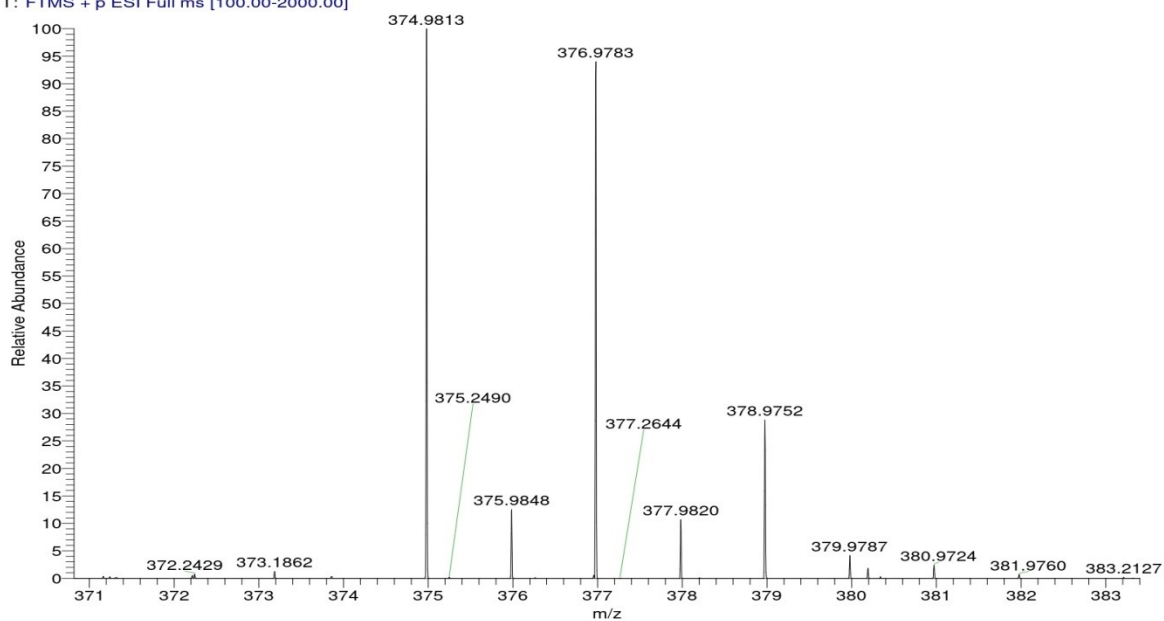

HRMS19I19SEP21 #7 RT: 0.10 AV: 1 SB: 5 0.02-0.08 NL: 3.01E5  
T: FTMS + p ESI Full ms [100.00-2000.00]

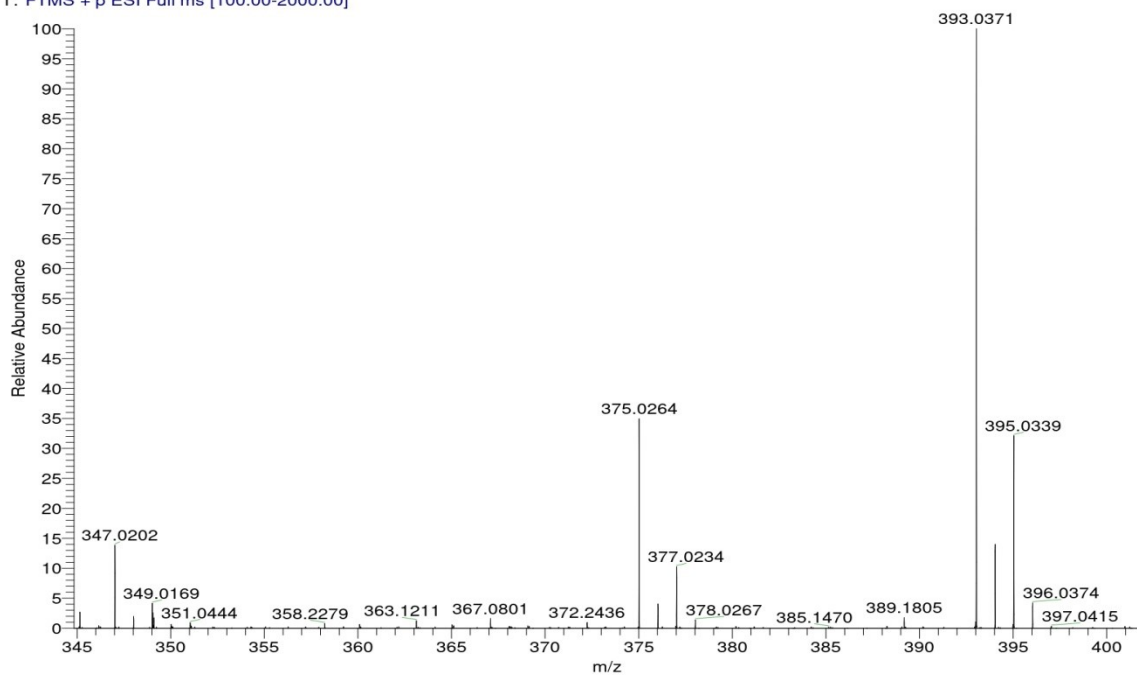

HRMS19I19SEP23 #8 RT: 0.12 AV: 1 SB: 5 0.02-0.08 NL: 1.64E6  
T: FTMS + p ESI Full ms [100.00-2000.00]

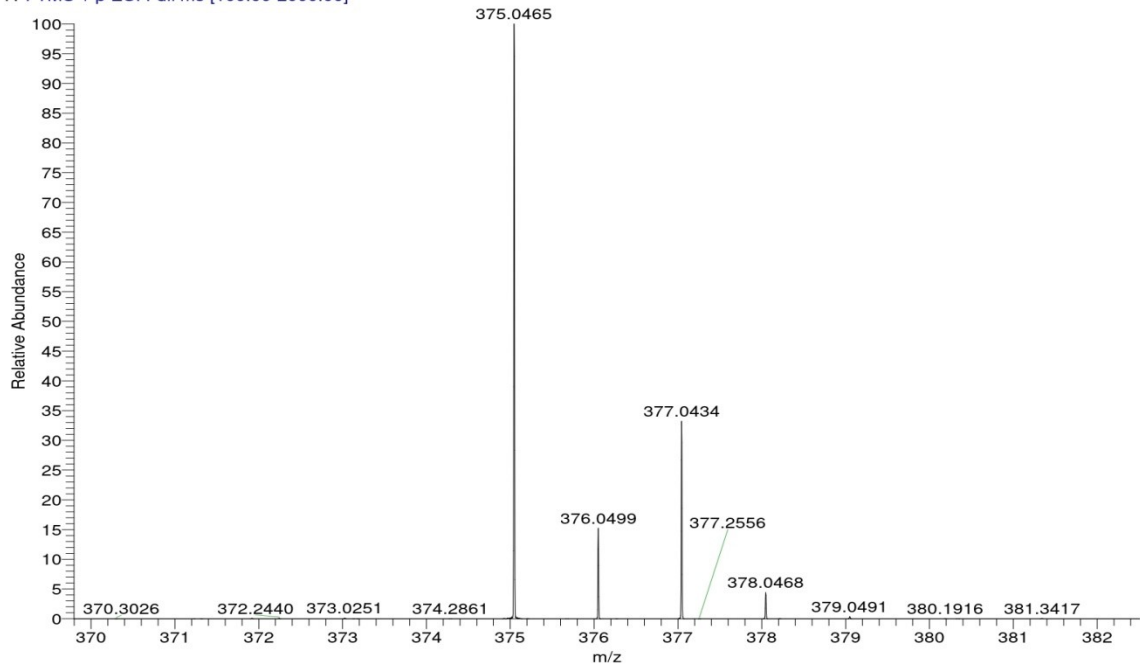

HRMS19I19SEP24 #8 RT: 0.12 AV: 1 SB: 5 0.02-0.08 NL: 4.01E5  
T: FTMS + p ESI Full ms [100.00-2000.00]

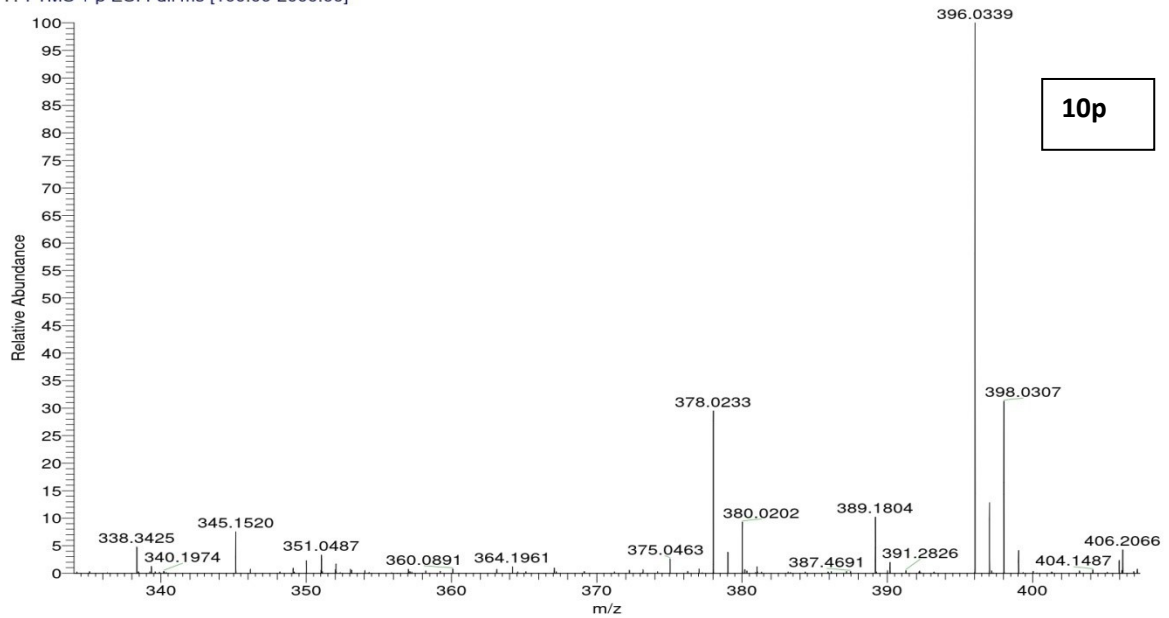

HRMS19I19SEP25 #9 RT: 0.13 AV: 1 SB: 5 0.02-0.08 NL: 1.29E6  
T: FTMS + p ESI Full ms [100.00-2000.00]

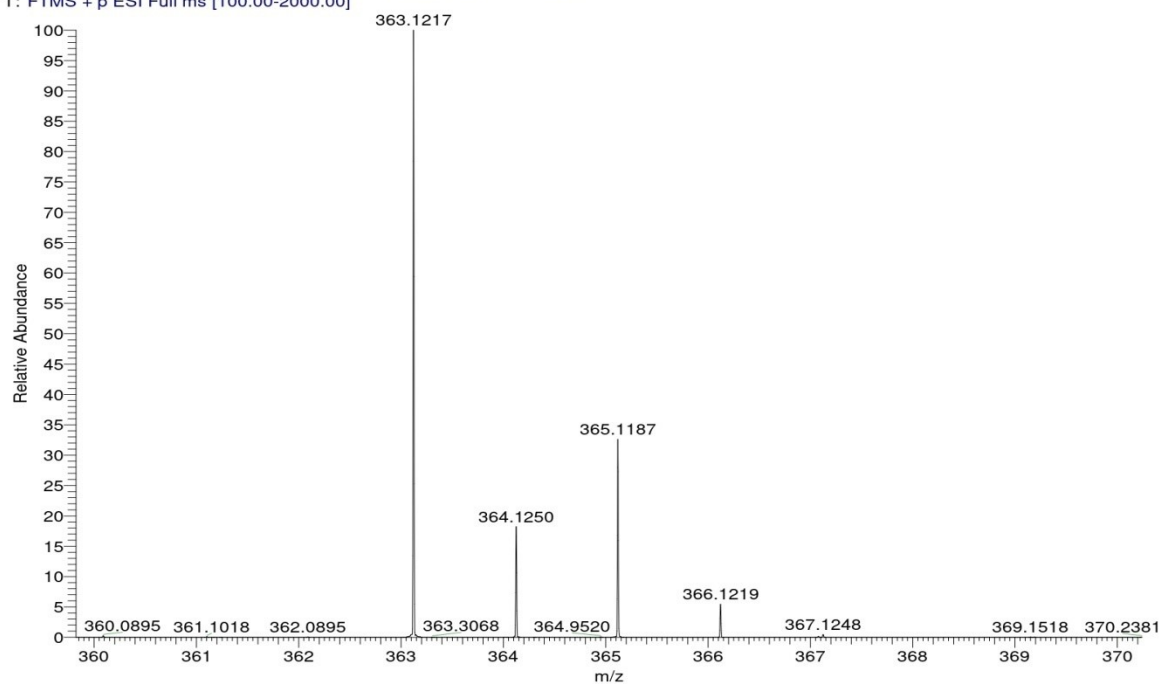

HRMS19I10OCT26\_191010163903 #5 RT: 0.12 AV: 1 SB: 2 0.03-0.06 NL: 6.60E2  
T: FTMS + p ESI Full ms [100.00-2000.00]

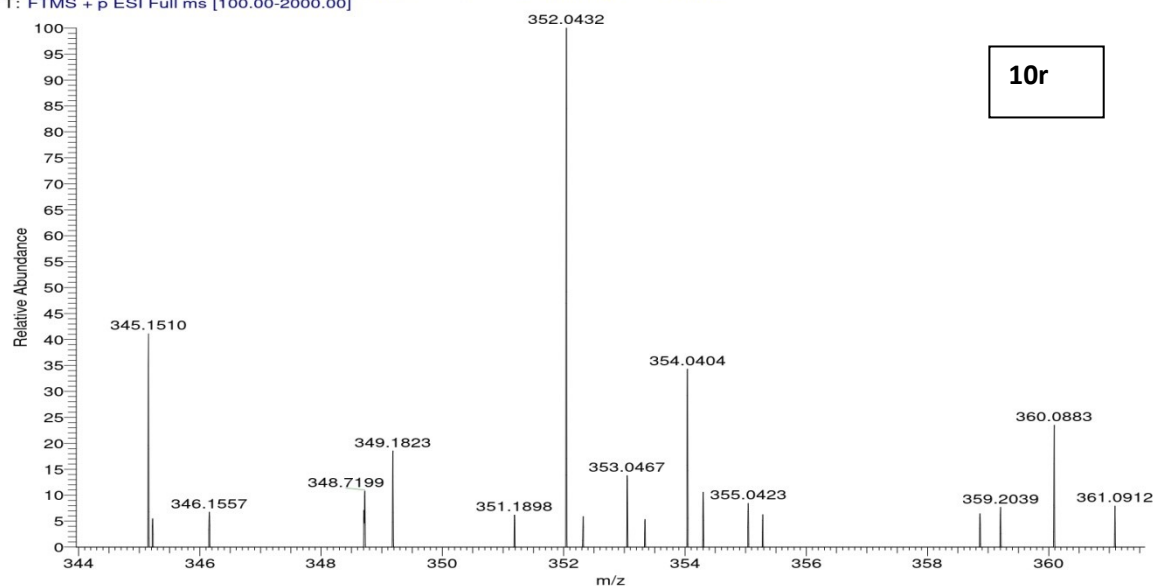**10r**

HRMS1910OCT27\_191010164102 #5 RT: 0.12 AV: 1 SB: 2 0.03-0.06 NL: 4.75E4  
T: FTMS + p ESI Full ms [100.00-2000.00]

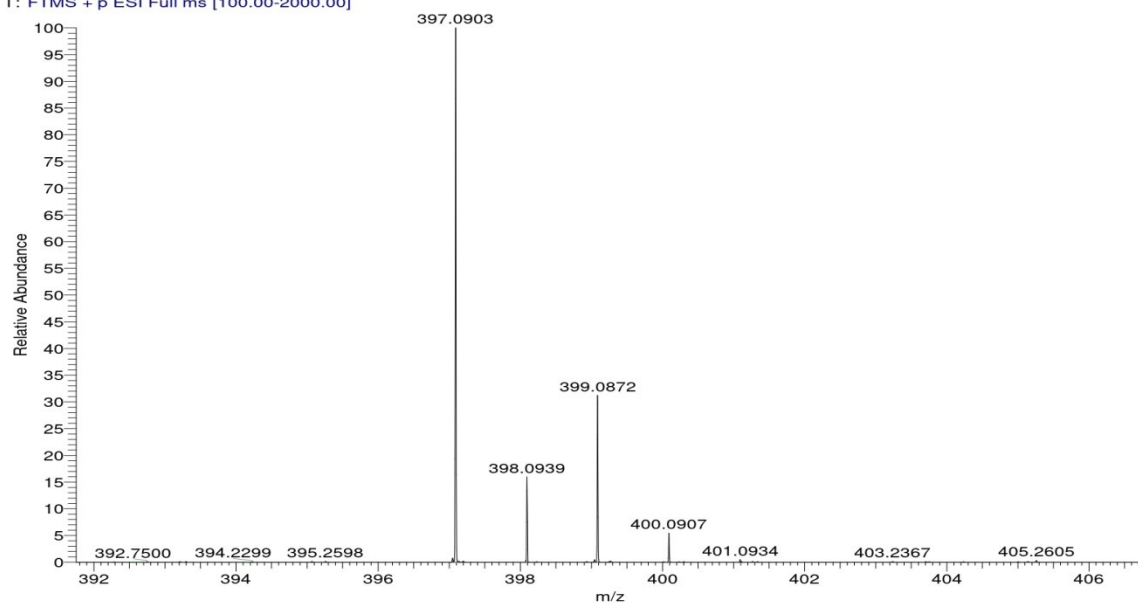

HRMS1910OCT29\_191010164459 #6 RT: 0.16 AV: 1 SB: 2 0.03-0.06 NL: 7.80E3  
T: FTMS + p ESI Full ms [100.00-2000.00]

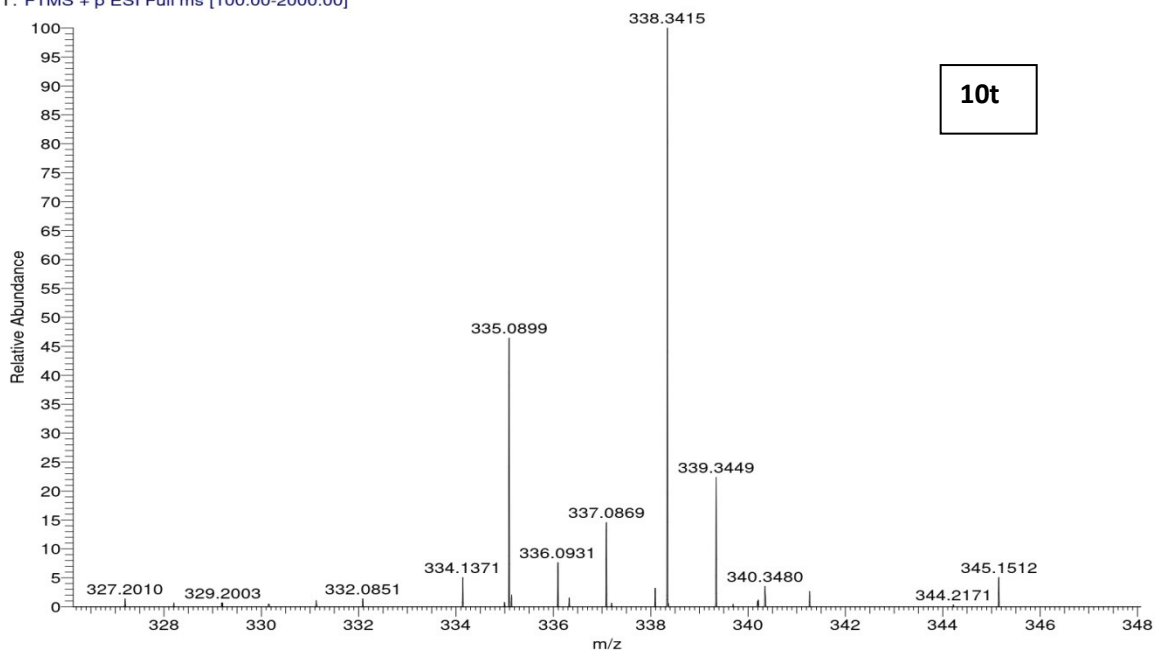

HRMS19110OCT30\_191010164658 #4 RT: 0.09 AV: 1 SB: 2 0.03-0.06 NL: 4.13E4  
T: FTMS + p ESI Full ms [100.00-2000.00]

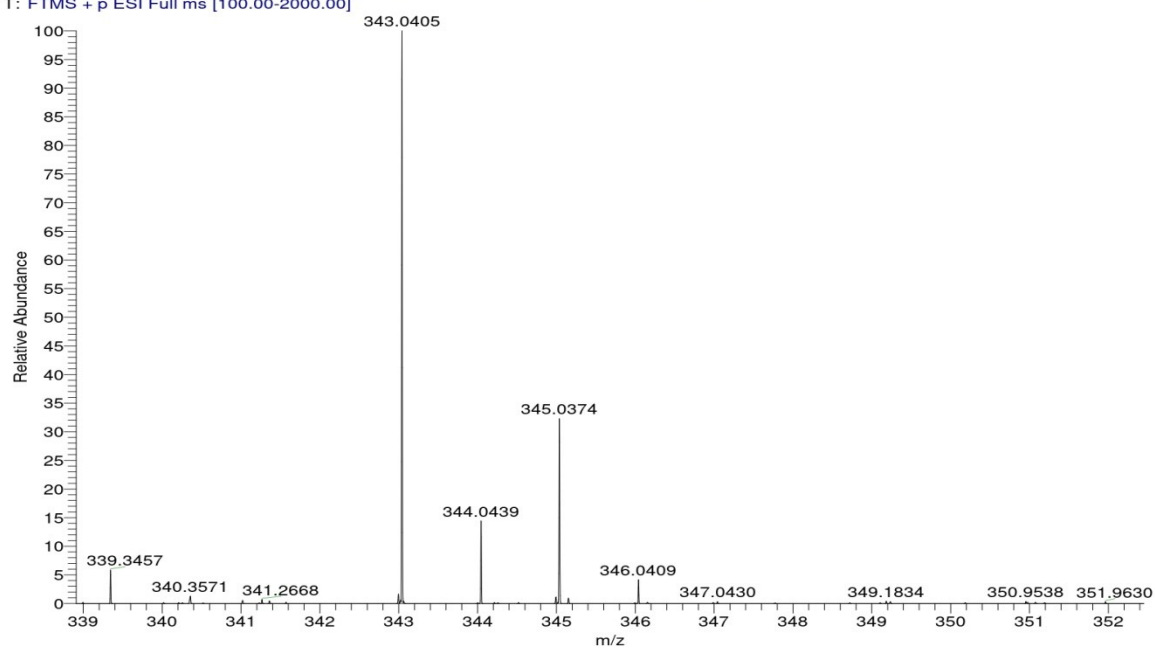

HRMS19110OCT31\_191010164857 #4 RT: 0.09 AV: 1 SB: 2 0.03-0.06 NL: 3.92E3  
T: FTMS + p ESI Full ms [100.00-2000.00]

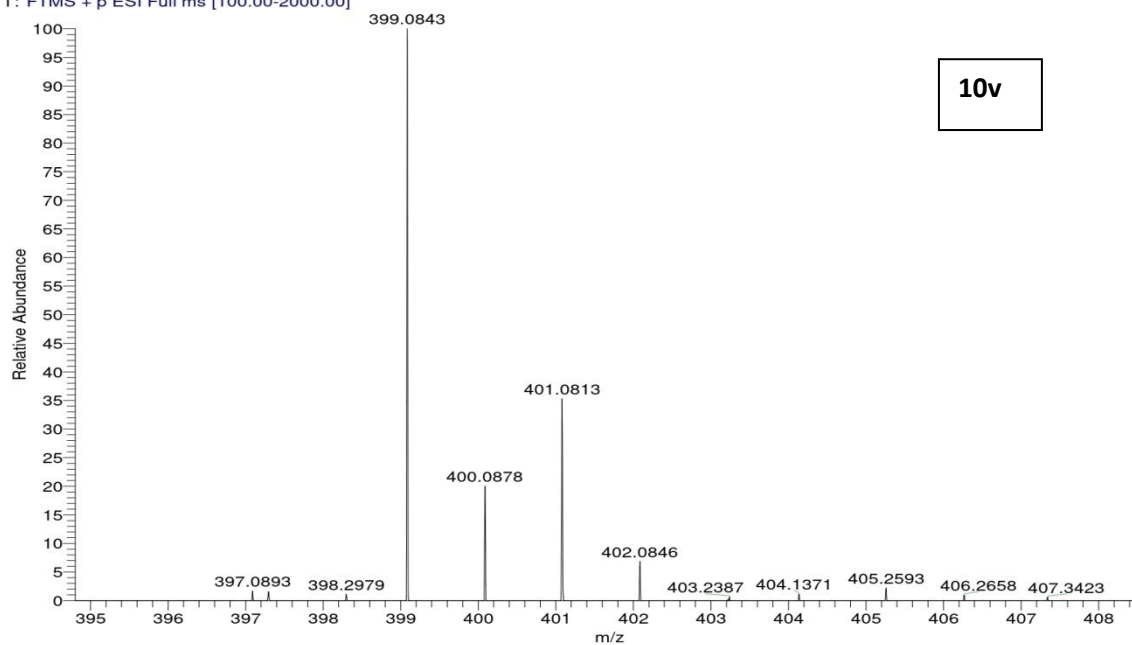

10v



HRMS19110OCT32\_191010165055 #6 RT: 0.16 AV: 1 SB: 2 0.03-0.06 NL: 1.58E4  
T: FTMS + p ESI Full ms [100.00-2000.00]

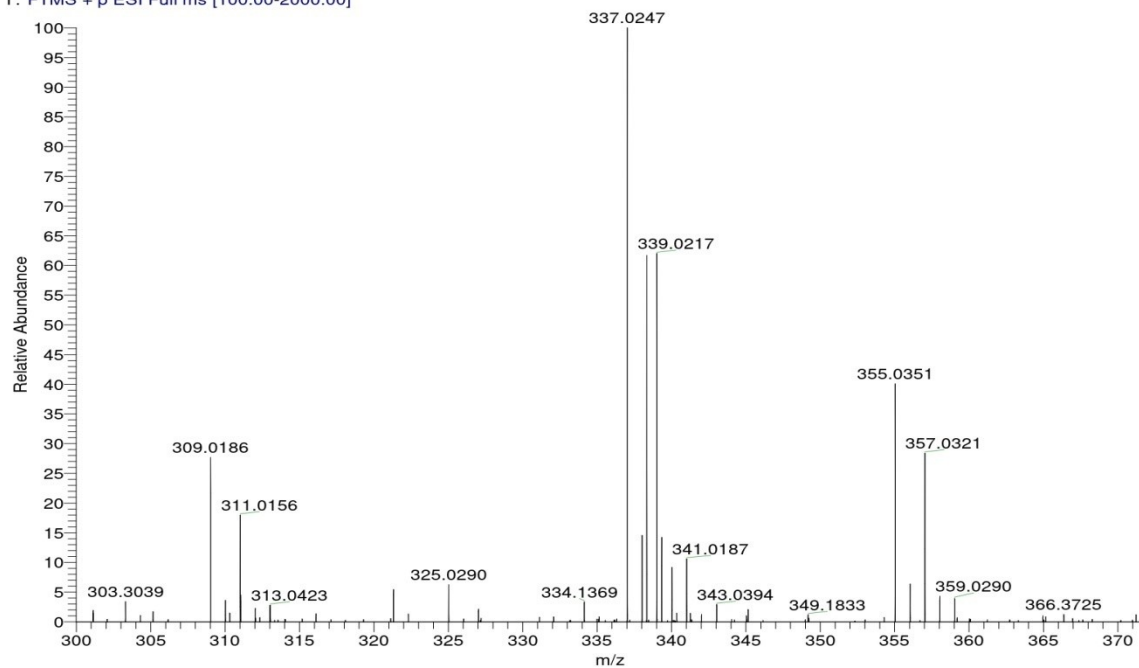

HRMS19110OCT33\_191010165254 #6 RT: 0.16 AV: 1 SB: 2 0.03-0.06 NL: 2.94E3  
T: FTMS + p ESI Full ms [100.00-2000.00]

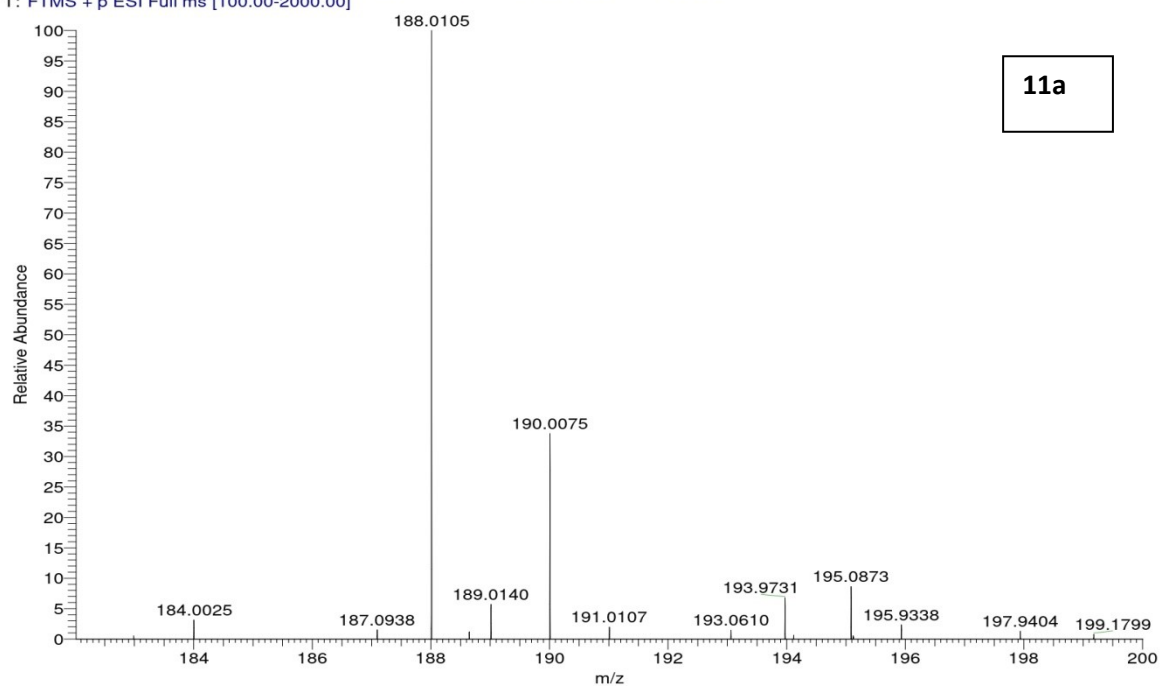**11a**
